# Supplementary material for: How common is it to get an OER overpotential that is <250 mV?
Source: Royal Society of Chemistry journal article supplement (doi:10.1039/d5ta00009b), 2025-01-01
Supplement: d5ta00009b1.pdf [file d5ta00009b1.pdf]

## Electronic Supplementary Information

### **“The 250 mV Barrier”: A Thermodynamic Ceiling That Every OER/ORR Researcher Must Know!**

**Pracheta Trivedi<sup>#</sup>, Neha Clare Minj<sup>#</sup>, Sneha Mittal<sup>#</sup>, Balakumaran Kamaraj<sup>#</sup>, Sandeep  
Yadav<sup>#</sup>, and Anantharaj Sengeni<sup>\*</sup>**

Laboratory for Electrocatalysis and Energy (LEE), Department of Chemistry, Indian Institute of  
Technology, Kanpur 208 016, Uttar Pradesh, India

<sup>#</sup>These authors have contributed equally.

<sup>\*</sup> Correspondence should be addressed to: [ananthsatiitk.ac.in](mailto:ananthsatiitk.ac.in)

**Table S1:** Recently reported OER overpotentials measured for the current density of 10 mA cm<sup>-2</sup> (unless otherwise specified) against different reference electrodes for various catalysts listed in Figure 1 (in main text) in 1.0 M KOH since 2019.

| <i>Catalyst</i>                                   | $\eta^{10} / mV$               | <i>DOI</i>                                                                                                        | <i>Bibliography</i>                                                       |
|---------------------------------------------------|--------------------------------|-------------------------------------------------------------------------------------------------------------------|---------------------------------------------------------------------------|
| <i>NiS<sub>x</sub>/C<sub>3</sub>N<sub>4</sub></i> | 32                             | <a href="https://doi.org/10.1039/D1EE00509J">https://doi.org/10.1039/D1EE00509J</a>                               | <i>Energy Environ Sci</i> , 2021, <b>14</b> , 5358–5365                   |
| <i>CuCo/CP</i>                                    | 80                             | <a href="https://doi.org/10.1016/j.molliq.2022.118635">https://doi.org/10.1016/j.molliq.2022.118635</a>           | <i>J Mol Liq</i> , 2022, <b>351</b> , 118635                              |
| <i>MCC@Ag_45W</i>                                 | 83                             | <a href="https://pubs.acs.org/doi/10.1021/acsapm.2c03455">https://pubs.acs.org/doi/10.1021/acsapm.2c03455</a>     | <i>ACS Appl Mater</i> , 2023, <b>6</b> , 2286–2295                        |
| <i>NiSe/NF</i>                                    | 136 at 100 mA cm <sup>-2</sup> | <a href="http://dx.doi.org/10.1016/j.electacta.2016.12.070">http://dx.doi.org/10.1016/j.electacta.2016.12.070</a> | <i>Electrochim Acta</i> , 2017, <b>224</b> , 412–418                      |
| <i>FF-Na<sub>500</sub>Ni<sub>500</sub></i>        | 150 at 20 mA cm <sup>-2</sup>  | <a href="https://doi.org/10.1002/sml.202000663">https://doi.org/10.1002/sml.202000663</a>                         | <i>Small</i> , 2020, <b>16</b> , 2000663                                  |
| <i>NiFe-LDH/RGO/NF</i>                            | 150                            | <a href="https://doi.org/10.1016/j.ijhydene.2018.11.167">https://doi.org/10.1016/j.ijhydene.2018.11.167</a>       | <i>Int J Hydrogen Energy</i> , 2019, <b>44</b> , 2656–2663.               |
| <i>Co(OH)<sub>2</sub>@HOS/CP</i>                  | 153 at 100 mA cm <sup>-2</sup> | <a href="https://doi.org/10.1002/adfm.201909610">https://doi.org/10.1002/adfm.201909610</a>                       | <i>Adv Funct Mater</i> , 2020, <b>30</b> , 1909610                        |
| <i>Co(OH)<sub>2</sub>@HOS/CP</i>                  | 155                            | <a href="https://doi.org/10.1002/adfm.201909610">https://doi.org/10.1002/adfm.201909610</a>                       | <i>Adv Funct Mater</i> , 2020, <b>30</b> , 1909610                        |
| <i>MnFeO-NF-0.4</i>                               | 157                            | <a href="https://doi.org/10.1039/d0nr05864e">https://doi.org/10.1039/d0nr05864e</a>                               | <i>Nanoscale</i> , 2020, <b>12</b> , 19992–20001                          |
| <i>C-Qds-Mn</i>                                   | 166.71                         | <a href="https://doi.org/10.1016/j.jics.2022.100775">https://doi.org/10.1016/j.jics.2022.100775</a>               | <i>Journal of the Indian Chemical Society</i> , 2022, <b>99</b> , 100775. |
| <i>Pd/NiFeO<sub>x</sub></i>                       | 180                            | <a href="https://doi.org/10.1002/adfm.202107181">https://doi.org/10.1002/adfm.202107181</a>                       | <i>Adv Funct Mater</i> , 2021,                                            |

|                                                         |     |                                                                                                           |                                                                                 |
|---------------------------------------------------------|-----|-----------------------------------------------------------------------------------------------------------|---------------------------------------------------------------------------------|
|                                                         |     |                                                                                                           | <b>31, 2107181</b>                                                              |
| <i>np-NiAl-LDH/NF</i>                                   | 180 | <a href="https://doi.org/10.1039/d0se00050g">https://doi.org/10.1039/d0se00050g</a>                       | <i>Sustain Energy Fuels</i> , 2020, <b>4</b> , 2850–2858.                       |
| <i>NiFe(OH)<sub>x</sub>/(Ni, Fe)Se<sub>2</sub>/CC</i>   | 180 | <a href="https://doi.org/10.1002/sml.202007334">https://doi.org/10.1002/sml.202007334</a>                 | <i>Small</i> 2021, <b>17</b> , 2007334                                          |
| <i>Ni<sub>x</sub>Fe<sub>3-x</sub>O<sub>4</sub>/EDTA</i> | 180 | <a href="https://doi.org/10.1016/j.jcis.2022.11.054">https://doi.org/10.1016/j.jcis.2022.11.054</a>       | <i>J Colloid Interface Sci</i> , 2023, <b>632</b> , 44–53.                      |
| <i>Fe-K<sub>2</sub>WO<sub>4</sub></i>                   | 181 | <a href="https://doi.org/10.1016/j.apcatb.2024.124423">https://doi.org/10.1016/j.apcatb.2024.124423</a>   | <i>Applied Catalysis B: Environment and Energy</i> , 2024, <b>358</b> , 124423. |
| <i>NiFeCoMnAl</i>                                       | 190 | <a href="https://doi.org/10.1016/j.apcatb.2021.120764">https://doi.org/10.1016/j.apcatb.2021.120764</a>   | <i>Appl Catal B</i> , 2022, <b>301</b> , 120764                                 |
| <i>Ag<sub>2</sub>Se/rGO</i>                             | 192 | <a href="https://doi.org/10.1016/j.jallcom.2024.174626">https://doi.org/10.1016/j.jallcom.2024.174626</a> | <i>J Alloys Compd</i> , 2024, <b>993</b> , 174626                               |
| <i>CF-FeSO</i>                                          | 192 | <a href="https://doi.org/10.1038/s41467-022-28260-5">https://doi.org/10.1038/s41467-022-28260-5</a>       | <i>Nat Commun</i> , 2022, <b>13</b> , 605.                                      |
| <i>np-NiFeCoMnOOH</i>                                   | 194 | <a href="https://doi.org/10.1016/j.apcatb.2023.123331">https://doi.org/10.1016/j.apcatb.2023.123331</a>   | <i>Appl Catal B</i> , 2024, <b>341</b> , 123331.                                |
| <i>V-NiFe-LDH/NF</i>                                    | 195 | <a href="https://doi.org/10.1039/d0dt01520b">https://doi.org/10.1039/d0dt01520b</a>                       | <i>Dalton Transactions</i> , 2020, <b>49</b> , 11217–11225                      |
| <i>VOOH-3Fe</i>                                         | 195 | <a href="https://doi.org/10.1002/sml.201904688">https://doi.org/10.1002/sml.201904688</a>                 | <i>Small</i> 2019, <b>15</b> , 1904688                                          |
| <i>NiFe-LDH/N10TC/NF</i>                                | 196 | <a href="https://doi.org/10.1002/cssc.202100043">https://doi.org/10.1002/cssc.202100043</a>               | <i>ChemSusChem</i> , 2021, <b>14</b> , 1948–1954                                |
| <i>β-NiFeOOH/NF</i>                                     | 196 | <a href="https://doi.org/10.1039/d2ta04688a">https://doi.org/10.1039/d2ta04688a</a>                       | <i>J Mater Chem A Mater</i> , 2022, <b>10</b> , 20847–                          |

|                                                |                                |                                                                                                             |                                                               |
|------------------------------------------------|--------------------------------|-------------------------------------------------------------------------------------------------------------|---------------------------------------------------------------|
|                                                |                                |                                                                                                             | 20855                                                         |
| <i>FeCoPd</i>                                  | 197                            | <a href="https://doi.org/10.1039/d2ta04436f">https://doi.org/10.1039/d2ta04436f</a>                         | <i>J Mater Chem A Mater</i> , 2022, <b>10</b> , 23731–23743   |
| <i>HCl-c-NiFe</i>                              | 197 at 100 mA cm <sup>-2</sup> | <a href="https://doi.org/10.1039/d0nr05458e">https://doi.org/10.1039/d0nr05458e</a>                         | <i>Nanoscale</i> , 2020, <b>12</b> , 21743–21749.             |
| <i>Ni-Fe-S@GIP</i>                             | 197                            | <a href="https://doi.org/10.1002/cssc.202100891">https://doi.org/10.1002/cssc.202100891</a>                 | <i>ChemSusChem</i> , 2021, <b>14</b> , 3131–3138.             |
| <i>(Ni,Fe)O<sub>x</sub>H<sub>y</sub>/Ni/Cu</i> | 199                            | <a href="https://doi.org/10.1039/C9CY02328C">https://doi.org/10.1039/C9CY02328C</a>                         | <i>Catal Sci Technol</i> , 2020, <b>10</b> , 1803–1808.       |
| <i>FeS-RGS NF</i>                              | 200                            | <a href="https://doi.org/10.1039/d1nr04138j">https://doi.org/10.1039/d1nr04138j</a>                         | <i>Nanoscale</i> , 2021, <b>13</b> , 14837–14846              |
| <i>FeCoNiWCuOOH@Cu</i>                         | 200                            | <a href="https://doi.org/10.1002/advs.202406008">https://doi.org/10.1002/advs.202406008</a>                 | <i>Adv. Sci.</i> 2024, <b>11</b> , 2406008                    |
| <i>Co<sub>3</sub>O<sub>4</sub>-C/FeMoP/NF</i>  | 200 at 20 mA cm <sup>-2</sup>  | <a href="https://doi.org/10.1016/j.ijhydene.2021.07.103">https://doi.org/10.1016/j.ijhydene.2021.07.103</a> | <i>Int J Hydrogen Energy</i> , 2021, <b>46</b> , 32846–32857. |
| <i>NiCoP/NF</i>                                | 203                            | <a href="https://doi.org/10.1016/j.ceramint.2022.09.035">https://doi.org/10.1016/j.ceramint.2022.09.035</a> | <i>Ceram Int</i> , 2023, <b>49</b> , 659–668.                 |
| <i>CuCo<sub>2</sub>B</i>                       | 204 at 100 mA cm <sup>-2</sup> | <a href="https://doi.org/10.1021/acssuschemeng.2c06708">https://doi.org/10.1021/acssuschemeng.2c06708</a>   | <i>ACS Sustain Chem Eng</i> , 2023, <b>11</b> , 2541–2553     |
| <i>NiFe<sub>A-S</sub>/NF</i>                   | 205                            | <a href="https://doi.org/10.1016/j.apcatb.2022.122165">https://doi.org/10.1016/j.apcatb.2022.122165</a>     | <i>Appl Catal B</i> , 2023, <b>323</b> , 122165.              |
| <i>Fe-CoP/Ni(OH)<sub>2</sub></i>               | 206                            | <a href="https://doi.org/10.1002/adfm.202101578">https://doi.org/10.1002/adfm.202101578</a>                 | <i>Adv Funct Mater</i> , 2021, <b>31</b> , 2101578            |
| <i>Ni<sub>3</sub>Te<sub>2</sub>-Au</i>         | 210                            | <a href="https://doi.org/10.1039/c8ta01760c">https://doi.org/10.1039/c8ta01760c</a>                         | <i>J Mater Chem A Mater</i> , 2018,                           |

|                             |                               |                                                                                                           |                                                                  |
|-----------------------------|-------------------------------|-----------------------------------------------------------------------------------------------------------|------------------------------------------------------------------|
|                             |                               |                                                                                                           | 6, 7608–7622                                                     |
| $NiFeCoS_x/FeNi_3$          | 210                           | <a href="https://doi.org/10.1039/d1ta07504g">https://doi.org/10.1039/d1ta07504g</a>                       | <i>J Mater Chem A Mater</i> , 2022, <b>10</b> , 5442–5451.       |
| $SSF@NiFe-120$              | 210                           | <a href="https://doi.org/10.1021/acssuschemeng.0c03017">https://doi.org/10.1021/acssuschemeng.0c03017</a> | <i>ACS Sustain Chem Eng</i> , 2020, <b>8</b> , 9885–9895.        |
| $CCF-1$                     | 210                           | <a href="https://doi.org/10.1016/j.cej.2020.126513">https://doi.org/10.1016/j.cej.2020.126513</a>         | <i>Chemical Engineering Journal</i> , 2021, <b>404</b> , 126513. |
| $FeNiSSe$                   | 213                           | <a href="https://doi.org/10.1016/j.jallcom.2020.156736">https://doi.org/10.1016/j.jallcom.2020.156736</a> | <i>J Alloys Compd</i> , 2021, <b>852</b> , 156736                |
| $NSC@NiFe$                  | 214                           | <a href="https://doi.org/10.1016/j.carbon.2020.06.022">https://doi.org/10.1016/j.carbon.2020.06.022</a>   | <i>Carbon N Y</i> , 2020, <b>167</b> , 548–558.                  |
| $FeNi$ (Oxy) Hydroxide      | 215                           | <a href="https://doi.org/10.1002/cctc.201900718">https://doi.org/10.1002/cctc.201900718</a>               | <i>ChemCatChem</i> , 2019, <b>11</b> , 3004–3009.                |
| $NiMo-Fe$                   | 217                           | <a href="https://doi.org/10.1016/j.apcatb.2022.121150">https://doi.org/10.1016/j.apcatb.2022.121150</a>   | <i>Appl Catal B</i> , 2022, <b>307</b> , 121150                  |
| $Ni_{3.2}Co_{4.2}MnP_{6.5}$ | 218 at 50 mA cm <sup>-2</sup> | <a href="https://doi.org/10.1039/d4ee00042k">https://doi.org/10.1039/d4ee00042k</a>                       | <i>Energy Environ Sci</i> , 2024, <b>17</b> , 5200–5215          |
| $Cu_{0.50}Fe_{0.50}/NF$     | 218                           | <a href="https://doi.org/10.1002/sml.201905884">https://doi.org/10.1002/sml.201905884</a>                 | <i>Small</i> , 2020, <b>16</b> , 1905884                         |
| $NiCo_2O_4$ (MNCO)          | 218                           | <a href="https://doi.org/10.1016/j.jallcom.2024.175375">https://doi.org/10.1016/j.jallcom.2024.175375</a> | <i>J Alloys Compd</i> , 2024, <b>1002</b> , 175375.              |
| $Fe_{0.5}Ni_{0.5}/40\% C$   | 219                           | <a href="https://doi.org/10.1002/sml.202203340">https://doi.org/10.1002/sml.202203340</a>                 | <i>Small</i> , 2020, <b>18</b> , 2203340                         |
| $NiFe-LDH/Raney-Ni$         | 219                           | <a href="https://doi.org/10.1016/j.apcata.2024.119858">https://doi.org/10.1016/j.apcata.2024.119858</a>   | <i>Appl Catal A Gen</i> , 2024, <b>683</b> , 119858              |
| $Fe-Co(OH)_2/Fe_2O_3$       | 219                           | <a href="https://doi.org/10.1002/adfm.2023052">https://doi.org/10.1002/adfm.2023052</a>                   | <i>Adv Funct</i>                                                 |

|                                             |                               |                                                                                                           |  |                                                                  |
|---------------------------------------------|-------------------------------|-----------------------------------------------------------------------------------------------------------|--|------------------------------------------------------------------|
|                                             |                               | 43                                                                                                        |  | <i>Mater</i> , 2023, <b>33</b> , 2305243                         |
| <i>Fe-NiFe(OH)</i>                          | 220                           | <a href="https://doi.org/10.1039/d1ta10103j">https://doi.org/10.1039/d1ta10103j</a>                       |  | <i>J Mater Chem A Mater</i> , 2022, <b>10</b> , 8989–9000.       |
| <i>Fe-Ni<sub>3</sub>S<sub>2</sub>/2OX</i>   | 220                           | <a href="https://doi.org/10.1021/acssuschemeng.2c02456">https://doi.org/10.1021/acssuschemeng.2c02456</a> |  | <i>ACS Sustain Chem Eng</i> , 2022, <b>10</b> , 14396–14406.     |
| <i>FeCoNiO<sub>x</sub>/C/NF</i>             | 221                           | <a href="https://doi.org/10.1016/j.apcatb.2023.122717">https://doi.org/10.1016/j.apcatb.2023.122717</a>   |  | <i>Appl Catal B</i> , 2023, <b>332</b> , 122717.                 |
| <i>HS-Te-NiCo-LDH/NiO/NF</i>                | 221                           | <a href="https://doi.org/10.1039/d1ma00688f">https://doi.org/10.1039/d1ma00688f</a>                       |  | <i>Mater Adv</i> , 2022, <b>3</b> , 1286–1294                    |
| <i>NiFe/NiFe-OH</i>                         | 222                           | <a href="https://doi.org/10.1016/j.apcatb.2020.119326">https://doi.org/10.1016/j.apcatb.2020.119326</a>   |  | <i>Wang, Appl Catal B</i> , 2020, <b>278</b> , 119326.           |
| <i>CoPx/FeOOH</i>                           | 222                           | <a href="https://doi.org/10.1016/j.apcatb.2020.119326">https://doi.org/10.1016/j.apcatb.2020.119326</a>   |  | <i>Applied Catalysis B: Environmental</i> 294 (2021) 120256      |
| <i>Ni-Fe-S</i>                              | 223                           | <a href="https://doi.org/10.1039/d1nj02382a">https://doi.org/10.1039/d1nj02382a</a>                       |  | <i>New Journal of Chemistry</i> , 2021, <b>45</b> , 12996–13003  |
| <i>Graphene quantum dots (GQDs)</i>         | 223 at 50 mA cm <sup>-2</sup> | <a href="https://doi.org/10.1016/j.cej.2024.151436">https://doi.org/10.1016/j.cej.2024.151436</a>         |  | <i>Chemical Engineering Journal</i> , 2024, <b>489</b> , 151436. |
| <i>Co<sub>6</sub>Mo<sub>6</sub>C/MoC/Co</i> | 223                           | <a href="https://doi.org/10.1016/j.apcatb.2023.122474">https://doi.org/10.1016/j.apcatb.2023.122474</a>   |  | <i>Appl Catal B</i> , 2023, <b>328</b> , 122474.                 |
| <i>NiCo-LDH@FeOOH/CFP</i>                   | 224                           | <a href="https://doi.org/10.1016/j.nanoen.2019.104367">https://doi.org/10.1016/j.nanoen.2019.104367</a>   |  | <i>Nano Energy</i> , 2020, <b>69</b> , 104367                    |
| <i>NiCo-LDH@FeOOH</i>                       | 224                           | <a href="https://doi.org/10.1016/j.nanoen.2019.104367">https://doi.org/10.1016/j.nanoen.2019.104367</a>   |  | <i>Nano Energy</i> ,                                             |

|                                                                               |                               |                                                                                                                                 |                                                              |
|-------------------------------------------------------------------------------|-------------------------------|---------------------------------------------------------------------------------------------------------------------------------|--------------------------------------------------------------|
|                                                                               |                               |                                                                                                                                 | 2020, <b>69</b> ,<br>104367                                  |
| <i>rGO/SnTe</i>                                                               | 226                           | <a href="https://doi.org/10.1002/er.8685">https://doi.org/10.1002/er.8685</a>                                                   | <i>Int J Energy Res</i> , 2022, <b>46</b> , 24622–24632      |
| <i>Co<sub>9</sub>Se<sub>8</sub>/Co<sub>9</sub>S<sub>8</sub>/CoO (Co-S-Se)</i> | 226                           | <a href="https://doi.org/10.1038/s41427-022-00398-0">https://doi.org/10.1038/s41427-022-00398-0</a>                             | <i>NPG Asia Mater</i> , 2022, <b>14</b> , 55.                |
| <i>FeOx@hcp Ni</i>                                                            | 226                           | <a href="https://doi.org/10.1016/j.apcatb.2020.119687">https://doi.org/10.1016/j.apcatb.2020.119687</a>                         | <i>Appl Catal B</i> , 2021, <b>284</b> , 119687.             |
| <i>NiFeCoPrO-Au/NF</i>                                                        | 228 at 60 mA cm <sup>-2</sup> | <a href="http://dx.doi.org/10.1021/acs.inorgchem.9b02230">http://dx.doi.org/10.1021/acs.inorgchem.9b02230</a>                   | <i>Inorg Chem</i> , 2019, <b>58</b> , 15841–15852            |
| <i>FeCoNiP/CF</i>                                                             | 228                           | <a href="https://doi.org/10.1016/j.solidstatesciences.2023.107205">https://doi.org/10.1016/j.solidstatesciences.2023.107205</a> | <i>Solid State Sciences</i> 141 (2023) 107205                |
| <i>Br-SSM</i>                                                                 | 228                           | <a href="https://doi.org/10.1016/j.jcis.2024.07.043">https://doi.org/10.1016/j.jcis.2024.07.043</a>                             | <i>Colloid Interface Sci</i> , 2024, <b>675</b> , 1011–1020. |
| <i>NiFeMo/NF</i>                                                              | 230 at 20 mA cm <sup>-2</sup> | <a href="https://doi.org/10.1016/j.electacta.2017.12.110">https://doi.org/10.1016/j.electacta.2017.12.110</a>                   | <i>Electrochim Acta</i> , 2018, <b>260</b> , 477–482         |
| <i>CCW-KOH-600</i>                                                            | 230                           | <a href="https://doi.org/10.1016/j.chphi.2023.100175">https://doi.org/10.1016/j.chphi.2023.100175</a>                           | <i>Chemical Physics Impact</i> , 2023, <b>6</b> , 100175     |
| <i>N-NiFe LDH</i>                                                             | 230                           | <a href="https://doi.org/10.1002/aenm.201500936">https://doi.org/10.1002/aenm.201500936</a>                                     | <i>Adv Energy Mater.</i> , 2015, <b>5</b> , 1500936          |
| <i>Ni<sub>4</sub> Mo/MoO<sub>2</sub> -550</i>                                 | 230                           | <a href="https://doi.org/10.1002/smt.202201659">https://doi.org/10.1002/smt.202201659</a>                                       | <i>Small Methods</i> , 2023, <b>7</b> , 2201659              |
| <i>Ni/NiO@CoFe</i>                                                            | 230                           | <a href="https://doi.org/10.1002/cssc.201900479">https://doi.org/10.1002/cssc.201900479</a>                                     | <i>ChemSusChem</i> 2019, <b>12</b> , 2773 – 2779             |
| <i>Co(OH)<sub>2</sub></i>                                                     | 230                           | <a href="https://doi.org/10.1016/j.electacta.2022.140071">https://doi.org/10.1016/j.electacta.2022.140071</a>                   | <i>Electrochim Acta</i> , 2022, <b>411</b> , 140071.         |

|                             |                                |                                                                                                               |                                                                                 |
|-----------------------------|--------------------------------|---------------------------------------------------------------------------------------------------------------|---------------------------------------------------------------------------------|
| $CoFeWO_x$                  | 231                            | <a href="https://doi.org/10.1002/aenm.202002593">https://doi.org/10.1002/aenm.202002593</a>                   | <i>Adv Energy Mater</i> , 2020, <b>10</b> , 2002593                             |
| $2h-Ni/NiO$ SPE             | 231                            | <a href="https://doi.org/10.1039/d0ra10597j">https://doi.org/10.1039/d0ra10597j</a>                           | <i>RSC Adv</i> , 2021, <b>11</b> , 14654–14664                                  |
| $CoP@a-CoOx$                | 232                            | <a href="https://doi.org/10.1002/advs.201800514">https://doi.org/10.1002/advs.201800514</a>                   | <i>Advanced Science</i> , 2018, <b>5</b> , 1800514                              |
| $ZnFe_2O_4@Zn(Fe)OOH$       | 232                            | <a href="https://doi.org/10.1002/celec.202000834">https://doi.org/10.1002/celec.202000834</a>                 | <i>ChemElectro Chem</i> , 2020, <b>7</b> , 3478–3486                            |
| $NFO-S5$                    | 232 at 100 mA cm <sup>-2</sup> | <a href="https://doi.org/10.1016/j.apcatb.2021.121030">https://doi.org/10.1016/j.apcatb.2021.121030</a>       | <i>Appl Catal B</i> , 2022, <b>305</b> , 121030.                                |
| $AB@NiFeSx$                 | 232.2                          | <a href="https://doi.org/10.1007/s12274-021-3800-6">https://doi.org/10.1007/s12274-021-3800-6</a>             | <i>Nano Res</i> , 2022, <b>15</b> , 1901–1908.                                  |
| $Cu@FeCN$                   | 234 at 20 mA cm <sup>-2</sup>  | <a href="https://doi.org/10.1021/acs.energyfuels.3c03233">https://doi.org/10.1021/acs.energyfuels.3c03233</a> | <i>Energy &amp; Fuels</i> , 2023, <b>37</b> , 16588–16598                       |
| $RuCu$ NSs/C-350 °C         | 234                            | <a href="https://doi.org/10.1002/anie.201908092">https://doi.org/10.1002/anie.201908092</a>                   | <i>Angewandte Chemie International Edition</i> , 2019, <b>58</b> , 13983–13988. |
| $FeCoNi$ AG                 | 235                            | <a href="https://doi.org/10.1016/j.cej.2021.132955">https://doi.org/10.1016/j.cej.2021.132955</a>             | <i>Chemical Engineering Journal</i> , 2022, <b>430</b> , 132955.                |
| $Co_{0.75}Ni_{0.25}(OH)_2$  | 235                            | <a href="https://doi.org/10.1002/sml.201804832">https://doi.org/10.1002/sml.201804832</a>                     | <i>Small</i> 2019, <b>15</b> , 1804832                                          |
| $Mn-FeP/Co_3(PO_4)_2$       | 237                            | <a href="https://doi.org/10.1002/cssc.201802437">https://doi.org/10.1002/cssc.201802437</a>                   | <i>ChemSusChem</i> , 2019, <b>12</b> , 1334–1341.                               |
| $Ni_2P_2O_7 \cdot 8H_2O/SS$ | 239                            | <a href="https://doi.org/10.1016/j.jallcom.2018.11.213">https://doi.org/10.1016/j.jallcom.2018.11.213</a>     | <i>J Alloys Compd</i> , 2019, <b>779</b> , 49–58.                               |



|                                                       |                                |                                                                                                               |                                                               |
|-------------------------------------------------------|--------------------------------|---------------------------------------------------------------------------------------------------------------|---------------------------------------------------------------|
| <i>NiFe/TiO<sub>2</sub></i>                           | 240                            | <a href="https://doi.org/10.1016/j.jallcom.2024.175729">https://doi.org/10.1016/j.jallcom.2024.175729</a>     | <i>J Alloys Compd</i> , 2024, <b>1004</b> , 175729            |
| <i>5%-Ir-MnO<sub>2</sub></i>                          | 240                            | <a href="https://doi.org/10.1039/d2se00701k">https://doi.org/10.1039/d2se00701k</a>                           | <i>Sustainable Energy Fuels</i> , 2022, <b>6</b> , 3649–3657  |
| <i>FeNi/CoCH/Ni</i>                                   | 240 at 20 mA cm <sup>-2</sup>  | <a href="https://doi.org/10.1039/d1nr08035k">https://doi.org/10.1039/d1nr08035k</a>                           | <i>Nanoscale</i> , 2022, <b>14</b> , 3191–3199                |
| <i>Ru<sub>x</sub>Cr<sub>1-x</sub>O<sub>y</sub>_20</i> | 240                            | <a href="https://doi.org/10.1039/d3ta05897b">https://doi.org/10.1039/d3ta05897b</a>                           | <i>J Mater Chem A Mater</i> , 2023, <b>11</b> , 26626–26635.  |
| <i>Te@FeOOH/NF</i>                                    | 241                            | <a href="https://doi.org/10.1002/celc.202100703">https://doi.org/10.1002/celc.202100703</a>                   | <i>ChemElectro Chem</i> , 2021, <b>8</b> , 3643–3650          |
| <i>Ag/NCMO/NF</i>                                     | 243                            | <a href="https://doi.org/10.1002/adfm.202107056">https://doi.org/10.1002/adfm.202107056</a>                   | <i>Adv Funct Mater</i> , 2022, <b>32</b> , 2107056            |
| <i>Ag/NCMO/NF</i>                                     | 243                            | <a href="https://doi.org/10.1002/adfm.202107056">https://doi.org/10.1002/adfm.202107056</a>                   | <i>Adv Funct Mater</i> , 2021, <b>32</b> , 2107056            |
| <i>FeOOH/Ni(OH)<sub>2</sub></i>                       | 245 at 50 mA cm <sup>-2</sup>  | <a href="https://doi.org/10.1039/c9nr08297b">https://doi.org/10.1039/c9nr08297b</a>                           | <i>Nanoscale</i> , 2020, <b>12</b> , 983–990.                 |
| <i>Cobalt oxyhydroxide(CoOOH)</i>                     | 245                            | <a href="https://doi.org/10.1016/j.electacta.2019.02.083">https://doi.org/10.1016/j.electacta.2019.02.083</a> | <i>Electrochim Acta</i> , 2019, <b>303</b> , 231–238.         |
| <i>NiFeOOH/NFF</i>                                    | 245 at 100 mA cm <sup>-2</sup> | <a href="https://doi.org/10.1016/j.ijhydene.2023.11.221">https://doi.org/10.1016/j.ijhydene.2023.11.221</a>   | <i>Int J Hydrogen Energy</i> , 2024, <b>55</b> , 464–473.     |
| <i>FeOOH/Ni/NiO/TM</i>                                | 246 at 50 mA cm <sup>-2</sup>  | <a href="https://doi.org/10.1039/d4nj01114g">https://doi.org/10.1039/d4nj01114g</a>                           | <i>New Journal of Chemistry</i> , 2024, <b>48</b> , 9954–9960 |
| <i>Ru-NiFe LDH</i>                                    | 246                            | <a href="http://dx.doi.org/10.1149/1945-7111/ac4cda">http://dx.doi.org/10.1149/1945-7111/ac4cda</a>           | <i>J Electrochem Soc</i> , 2022,                              |

|                                                                              |                                |                                                                                                               |                                                                              |
|------------------------------------------------------------------------------|--------------------------------|---------------------------------------------------------------------------------------------------------------|------------------------------------------------------------------------------|
|                                                                              |                                |                                                                                                               | <b>169</b> , 024503.                                                         |
| <i>n-MOF/CuO</i>                                                             | 247                            | <a href="https://doi.org/10.1016/j.fuel.2023.127638">https://doi.org/10.1016/j.fuel.2023.127638</a>           | <i>Fuel</i> , 2023, <b>341</b> , 127638                                      |
| <i>Ir-Te NWs</i>                                                             | 248                            | <a href="https://doi.org/10.1007/s12274-021-3603-9">https://doi.org/10.1007/s12274-021-3603-9</a>             | <i>Nano Res</i> , 2022, <b>15</b> , 1087–1093.                               |
| <i>Fe@Co-MOFs</i>                                                            | 248 at 50 mA cm <sup>-2</sup>  | <a href="https://doi.org/10.1039/D2DT01837C">https://doi.org/10.1039/D2DT01837C</a>                           | <i>Dalton Transactions</i> , 2022, <b>51</b> , 15446–15457.                  |
| <i>MIL-88A/Ni(OH)<sub>2</sub>-CC</i>                                         | 250                            | <a href="https://doi.org/10.1039/c9ta12865d">https://doi.org/10.1039/c9ta12865d</a>                           | <i>J Mater Chem A Mater</i> , 2020, <b>8</b> , 3311–3321                     |
| <i>FeNiO<sub>x</sub>(OH)<sub>y-2</sub></i>                                   | 250                            | <a href="https://doi.org/10.1016/j.jcis.2021.02.020">https://doi.org/10.1016/j.jcis.2021.02.020</a>           | <i>Colloid Interface Sci</i> , 2021, <b>591</b> , 307–313                    |
| <i>Ru/IrO<sub>x</sub> NPs</i>                                                | 250 at 3 mA cm <sup>-2</sup>   | <a href="https://doi.org/10.1016/j.electacta.2020.136058">https://doi.org/10.1016/j.electacta.2020.136058</a> | <i>Electrochim Acta</i> , 2020, <b>341</b> , 136058.                         |
| <i>Mn<sub>1-x</sub>Ni<sub>x</sub>Co<sub>2</sub>O<sub>4</sub>/rGO (x=0.6)</i> | 250                            | <a href="https://doi.org/10.1016/j.ijhydene.2019.12.164">https://doi.org/10.1016/j.ijhydene.2019.12.164</a>   | <i>Int J Hydrogen Energy</i> , 2020, <b>45</b> , 6391–6403.                  |
| <i>(Fe, Hf)CoOOH/Co(OH)<sub>2</sub></i>                                      | 250                            | <a href="https://doi.org/10.1039/D4QI00823E">https://doi.org/10.1039/D4QI00823E</a>                           | <i>Inorg Chem Front</i> , 2024, <b>11</b> , 5449–5457.                       |
| <i>r-BS+G</i>                                                                | 250                            | <a href="https://doi.org/10.1016/j.cej.2023.144489">https://doi.org/10.1016/j.cej.2023.144489</a>             | <i>Chemical Engineering Journal</i> , 2023, <b>471</b> , 144489.             |
| <i>F<sub>3</sub>S<sub>4</sub>/NF</i>                                         | 251                            | <a href="https://doi.org/10.1021/acs.jpcc.2c05196">https://doi.org/10.1021/acs.jpcc.2c05196</a>               | <i>The Journal of Physical Chemistry C</i> , 2022, <b>126</b> , 16172–16186. |
| <i>Ir-NFO/NF</i>                                                             | 251 at 100 mA cm <sup>-2</sup> | <a href="https://doi.org/10.1002/adfm.202209543">https://doi.org/10.1002/adfm.202209543</a>                   | <i>Adv Funct Mater</i> , 2023, <b>33</b> , 2209543.                          |

|                                              |                                |                                                                                                             |                                                                  |
|----------------------------------------------|--------------------------------|-------------------------------------------------------------------------------------------------------------|------------------------------------------------------------------|
| <i>FeCoNiOOH</i>                             | 252 at mA cm <sup>-2</sup>     | <a href="https://doi.org/10.1016/j.jmst.2021.08.083">https://doi.org/10.1016/j.jmst.2021.08.083</a>         | <i>J Mater Sci Technol</i> , 2022, <b>110</b> , 128–135.         |
| <i>WCoP/CC</i>                               | 252                            | <a href="https://doi.org/10.1002/celec.201901417">https://doi.org/10.1002/celec.201901417</a>               | <i>ChemElectro Chem</i> , 2019, <b>6</b> , 5229–5236.            |
| <i>NiCe@NiFe/NF-N</i>                        | 254 at 100 mA cm <sup>-2</sup> | <a href="https://doi.org/10.1016/j.apcatb.2019.118199">https://doi.org/10.1016/j.apcatb.2019.118199</a>     | <i>Appl Catal B</i> , 2020, <b>260</b> , 118199                  |
| <i>S-FeOOH<sub>+1000</sub>/IF</i>            | 254 at 100 mA cm <sup>-2</sup> | <a href="https://doi.org/10.1016/j.apcatb.2022.121571">https://doi.org/10.1016/j.apcatb.2022.121571</a>     | <i>Appl Catal B</i> , 2022, <b>315</b> , 121571.                 |
| <i>Ni/NiFeMoO<sub>x</sub>/NF</i>             | 255                            | <a href="https://doi.org/10.1002/advs.201902034">https://doi.org/10.1002/advs.201902034</a>                 | <i>Advanced Science</i> , 2020, <b>7</b> , 1902034               |
| <i>Ag@NiV0.2Co0.2</i>                        | 255                            | <a href="https://doi.org/10.1016/j.cej.2021.131662">https://doi.org/10.1016/j.cej.2021.131662</a>           | <i>Chemical Engineering Journal</i> , 2021, <b>425</b> , 131662. |
| <i>(CrFeCoNiMo)<sub>3</sub>O<sub>4</sub></i> | 255.3                          | <a href="https://doi.org/10.1002/adfm.202309438">https://doi.org/10.1002/adfm.202309438</a>                 | <i>Adv Funct Mater</i> , 2023, <b>34</b> , 2309438               |
| <i>FeOOH–NiCoMo LDH/NF</i>                   | 256 at 50 mA cm <sup>-2</sup>  | <a href="https://doi.org/10.1039/D2NJ00867J">https://doi.org/10.1039/D2NJ00867J</a>                         | <i>New Journal of Chemistry</i> , 2022, <b>46</b> , 7999–8009    |
| <i>NiFeCMo-30</i>                            | 256                            | <a href="https://doi.org/10.1016/j.ijhydene.2018.11.168">https://doi.org/10.1016/j.ijhydene.2018.11.168</a> | <i>Int J Hydrogen Energy</i> , 2019, <b>44</b> , 1336–1344.      |
| <i>NiFe-HD/pre-NF</i>                        | 256 at 100 mA cm <sup>-2</sup> | <a href="https://doi.org/10.1039/D1DT02195H">https://doi.org/10.1039/D1DT02195H</a>                         | <i>Dalton Transactions</i> , 2021, <b>50</b> , 12547–12554.      |
| <i>CoGa LDH/SSM</i>                          | 258                            | <a href="https://doi.org/10.1002/smt.201800286">https://doi.org/10.1002/smt.201800286</a>                   | <i>Small Methods</i> , 2019, <b>3</b> , 1800286                  |
| <i>NiFe-LDH pyramid</i>                      | 258                            | <a href="https://doi.org/10.1038/s41598-021-04347-9">https://doi.org/10.1038/s41598-021-04347-9</a>         | <i>Sci Rep</i> , 2022, <b>12</b> ,                               |

|                                          |                                |                                                                                                                 |                                                                 |
|------------------------------------------|--------------------------------|-----------------------------------------------------------------------------------------------------------------|-----------------------------------------------------------------|
|                                          |                                |                                                                                                                 | 346.                                                            |
| $Pt_{34}Fe_5Ni_{20}Cu_{31}Mo_9Ru$<br>HEA | 259                            | <a href="https://doi.org/10.1002/sml.202204255">https://doi.org/10.1002/sml.202204255</a>                       | <i>Small</i> , 2022, <b>18</b> , 2204255.                       |
| $NiFe_{0.5}Sn-A$                         | 260                            | <a href="https://doi.org/10.1002/adv.201903777">https://doi.org/10.1002/adv.201903777</a>                       | <i>Advanced Science</i> , 2020, <b>7</b> , 1903777              |
| $FeCoNiS / NF$                           | 260 at mA cm <sup>-2</sup>     | <a href="https://doi.org/10.1002/cssc.202200590">https://doi.org/10.1002/cssc.202200590</a>                     | <i>ChemSusChem</i> , 2022, <b>15</b> , e202200590.              |
| $Zn-NiCoO_{x-z}/SSM$                     | 260 at 50 mA cm <sup>-2</sup>  | <a href="https://doi.org/10.1016/j.jcis.2023.02.142">https://doi.org/10.1016/j.jcis.2023.02.142</a>             | <i>J Colloid Interface Sci</i> , 2023, <b>640</b> , 737–749.    |
| FCMOS                                    | 260                            | <a href="https://doi.org/10.1039/D1TA00457C">https://doi.org/10.1039/D1TA00457C</a>                             | <i>J Mater Chem A Mater</i> , 2021, <b>9</b> , 9858–9863.       |
| $Ag-Co(OH)_2$ on DNA                     | 260 at 50 mA cm <sup>-2</sup>  | <a href="https://dx.doi.org/10.1021/acs.inorgchem.0c03569">https://dx.doi.org/10.1021/acs.inorgchem.0c03569</a> | <i>Inorg Chem</i> , 2021, <b>60</b> , 2680–2693.                |
| $FeOOH@NiOOH/NF$                         | 261 at 20 mA cm <sup>-2</sup>  | <a href="https://doi.org/10.1016/j.jcis.2024.09.219">https://doi.org/10.1016/j.jcis.2024.09.219</a>             | <i>J Colloid Interface Sci</i> , 2025, <b>679</b> , 487–495.    |
| $Ni_2P-Fe_2P$                            | 261 at 100 mA cm <sup>-2</sup> | <a href="https://doi.org/10.1002/adfm.202006484">https://doi.org/10.1002/adfm.202006484</a>                     | <i>Adv Funct Mater</i> , 2020, <b>31</b> , 2006484              |
| $Ni_3N/NF$                               | 262                            | <a href="https://doi.org/10.1039/D1MA00130B">https://doi.org/10.1039/D1MA00130B</a>                             | <i>Mater Adv</i> , 2021, <b>2</b> , 2299–2309.                  |
| $Ni/Fe^{3+}$ foam                        | 262                            | <a href="https://doi.org/10.1039/d0ta02858d">https://doi.org/10.1039/d0ta02858d</a>                             | <i>J Mater Chem A Mater</i> , 2020, <b>8</b> , 12603–12612.     |
| $FeNi-LDH/MOF/CC-36$                     | 263 at 100 mA cm <sup>-2</sup> | <a href="https://doi.org/10.1016/j.cej.2024.152721">https://doi.org/10.1016/j.cej.2024.152721</a>               | <i>Chemical Engineering Journal</i> , 2024, <b>493</b> , 152721 |
| $CoCr_{0.7}Rh_{1.3}O_4$                  | 263                            | <a href="https://doi.org/10.1002/adfm.202301559">https://doi.org/10.1002/adfm.202301559</a>                     | <i>Adv Funct Mater</i> , 2023, <b>33</b> , 2301559              |
| $Fe-N-C/Fe$ NP 300                       | 263                            | <a href="https://doi.org/10.1002/cctc.20240078">https://doi.org/10.1002/cctc.20240078</a>                       | <i>ChemCatChem</i>                                              |

|                                                            |                                |   |                                                                                                     |                                                                 |
|------------------------------------------------------------|--------------------------------|---|-----------------------------------------------------------------------------------------------------|-----------------------------------------------------------------|
|                                                            |                                | 6 |                                                                                                     | <i>m</i> , 2024, <b>16</b> ,<br>e202400786                      |
| <i>NiCeWO<sub>x-2</sub></i>                                | 263                            |   | <a href="https://doi.org/10.1002/celc.202200093">https://doi.org/10.1002/celc.202200093</a>         | <i>ChemElectro Chem</i> , 2022, <b>9</b> ,<br>e202200093        |
| <i>NiFeBx</i>                                              | 263 ± 14                       |   | <a href="https://doi.org/10.1002/adfm.202101820">https://doi.org/10.1002/adfm.202101820</a>         | <i>Adv Funct Mater</i> , 2021, <b>31</b> , 2101820              |
| <i>FeCoMo-Se</i>                                           | 264                            |   | <a href="https://doi.org/10.1039/C9TA14133B">https://doi.org/10.1039/C9TA14133B</a>                 | <i>J Mater Chem A Mater</i> , 2020, <b>8</b> , 7925–7934.       |
| <i>np-NiMnFeMo</i>                                         | 265                            |   | <a href="https://doi.org/10.1016/j.cej.2020.126530">https://doi.org/10.1016/j.cej.2020.126530</a>   | <i>Chemical Engineering Journal</i> , 2021, <b>404</b> , 126530 |
| <i>CC/Co(OH)<sub>2</sub>/CoSe</i>                          | 268 at 20 mA cm <sup>-2</sup>  |   | <a href="https://doi.org/10.1039/c9na00725c">https://doi.org/10.1039/c9na00725c</a>                 | <i>Nanoscale Adv</i> , 2020, <b>2</b> , 792–797.                |
| <i>S-Ni-800</i>                                            | 268                            |   | <a href="https://doi.org/10.1039/d2qi00226d">https://doi.org/10.1039/d2qi00226d</a>                 | <i>Inorg Chem Front</i> , 2022, <b>9</b> , 1973–1983.           |
| <i>Te-Co<sub>3</sub>Se<sub>4</sub></i>                     | 269 at 50 mA cm <sup>-2</sup>  |   | <a href="https://doi.org/10.1016/j.jcis.2024.01.026">https://doi.org/10.1016/j.jcis.2024.01.026</a> | <i>J Colloid Interface Sci</i> , 2024, <b>659</b> , 767–775     |
| <i>CuWO<sub>4</sub>@rGO</i>                                | 270 at 1.0 mA cm <sup>-2</sup> |   | <a href="https://doi.org/10.1039/d1nj04617a">https://doi.org/10.1039/d1nj04617a</a>                 | <i>New Journal of Chemistry</i> , 2022, <b>46</b> , 1267–1272   |
| <i>Fe<sub>1.0</sub>Co<sub>1.1</sub>Ni<sub>1.4</sub>-NC</i> | 270                            |   | <a href="https://doi.org/10.1039/C9TA13637A">https://doi.org/10.1039/C9TA13637A</a>                 | <i>J Mater Chem A Mater</i> , 2020, <b>8</b> , 9021–9031.       |
| <i>La<sub>0.9</sub>Ce<sub>0.1</sub>NiO<sub>3</sub></i>     | 270                            |   | <a href="https://doi.org/10.1002/aenm.202003755">https://doi.org/10.1002/aenm.202003755</a>         | <i>Adv Energy Mater</i> , 2021, <b>11</b> , 2003755             |
| <i>PtRu<sub>2</sub>/PF</i>                                 | 270                            |   | <a href="https://doi.org/10.1016/j.jcis.2021.01.049">https://doi.org/10.1016/j.jcis.2021.01.049</a> | <i>J Colloid Interface Sci</i> , 2021, <b>590</b> , 154–163     |

|                                                                   |                                |                                                                                                             |                                                                         |
|-------------------------------------------------------------------|--------------------------------|-------------------------------------------------------------------------------------------------------------|-------------------------------------------------------------------------|
| $Ru_{0.5}Ir_{0.5}O_2$ NPs                                         | 270                            | <a href="https://doi.org/10.1016/j.ijhydene.2019.10.179">https://doi.org/10.1016/j.ijhydene.2019.10.179</a> | <i>Int J Hydrogen Energy</i> , 2020, <b>45</b> , 46–55.                 |
| $Cu_2S$ nanorods                                                  | 270                            | <a href="https://doi.org/10.1039/d0nj00909a">https://doi.org/10.1039/d0nj00909a</a>                         | <i>New Journal of Chemistry</i> , 2020, <b>44</b> , 8771–8777.          |
| NiCo-LDH                                                          | 270 at 20 mA cm <sup>-2</sup>  | <a href="https://doi.org/10.1039/d0se00899k">https://doi.org/10.1039/d0se00899k</a>                         | <i>Sustain Energy Fuels</i> , 2020, <b>4</b> , 5254–5263.               |
| NiFeMn LH                                                         | 270 at 50 mA cm <sup>-2</sup>  | <a href="https://doi.org/10.1016/j.cej.2024.154215">https://doi.org/10.1016/j.cej.2024.154215</a>           | <i>Chemical Engineering Journal</i> , 2024, <b>496</b> , 154215.        |
| Co S-NiFe <sub>2</sub> O <sub>4</sub>                             | 270 at 500 mA cm <sup>-2</sup> | <a href="https://doi.org/10.1016/j.colsurfa.2023.130682">https://doi.org/10.1016/j.colsurfa.2023.130682</a> | <i>Colloids Surf A Physicochem Eng Asp</i> , 2023, <b>658</b> , 130682. |
| NiFeCo/C                                                          | 271                            | <a href="https://doi.org/10.1039/d1ta07591h">https://doi.org/10.1039/d1ta07591h</a>                         | <i>J Mater Chem A Mater</i> , 2021, <b>9</b> , 27034–27040              |
| $(Co_{0.21}Ni_{0.25}Cu_{0.54})_3Se_2$                             | 272                            | <a href="https://doi.org/10.1039/c9ta00863b">https://doi.org/10.1039/c9ta00863b</a>                         | <i>J Mater Chem A Mater</i> , 2019, <b>7</b> , 9877–9889                |
| FN-2                                                              | 275                            | <a href="https://doi.org/10.1002/sml.201903410">https://doi.org/10.1002/sml.201903410</a>                   | <i>Small</i> , 2019, <b>15</b> , 1903410                                |
| CoFe <sub>2</sub> O <sub>4</sub>                                  | 275                            | <a href="https://doi.org/10.1039/D0CE00401D">https://doi.org/10.1039/D0CE00401D</a>                         | <i>CrystEngComm</i> , 2020, <b>22</b> , 4317–4323.                      |
| $\alpha$ -Co(OH) <sub>2</sub> /Co <sub>3</sub> O <sub>4</sub> /CC | 275                            | <a href="https://doi.org/10.1039/D1CY00240F">https://doi.org/10.1039/D1CY00240F</a>                         | <i>Catal Sci Technol</i> , 2021, <b>11</b> , 3706–3714.                 |

|                                                            |                                |                                                                                                               |                                                            |
|------------------------------------------------------------|--------------------------------|---------------------------------------------------------------------------------------------------------------|------------------------------------------------------------|
| <i>LiFeBPO/NF</i>                                          | 276 at 100 mA cm <sup>-2</sup> | <a href="https://doi.org/10.1002/adfm.202303702">https://doi.org/10.1002/adfm.202303702</a>                   | <i>Adv Funct Mater</i> , 2023, <b>33</b> , 2303702         |
| <i>SS Mesh</i>                                             | 277                            | <a href="https://doi.org/10.1039/c9ra07258f">https://doi.org/10.1039/c9ra07258f</a>                           | <i>RSC Adv</i> , 2019, <b>9</b> , 31563–31571              |
| <i>Co<sub>2</sub>C-NiTe/SS</i>                             | 279                            | <a href="https://doi.org/10.1016/j.fuel.2024.132445">https://doi.org/10.1016/j.fuel.2024.132445</a>           | <i>Fuel</i> , 2024, <b>375</b> , 132445                    |
| <i>(Fe-Ni)Co<sub>x</sub>-OH</i>                            | 280                            | <a href="https://doi.org/10.1016/j.apcatb.2019.118338">https://doi.org/10.1016/j.apcatb.2019.118338</a>       | <i>Appl Catal B</i> , 2020, <b>263</b> , 118338.           |
| <i>Ni<sub>0.34</sub>Co<sub>0.46</sub>Ir<sub>0.2</sub>O</i> | 280                            | <a href="https://doi.org/10.1016/j.apcatb.2018.10.041">https://doi.org/10.1016/j.apcatb.2018.10.041</a>       | <i>Appl Catal B</i> , 2019, <b>244</b> , 295–302.          |
| <i>CoO<sub>x</sub></i>                                     | 280                            | <a href="https://doi.org/10.1021/acs.energyfuels.4c00433">https://doi.org/10.1021/acs.energyfuels.4c00433</a> | <i>Energy &amp; Fuels</i> , 2024, <b>38</b> , 6938–6949.   |
| <i>FeP-CoP/NC/CC</i>                                       | 281                            | <a href="https://doi.org/10.1038/s41467-021-24284-5">https://doi.org/10.1038/s41467-021-24284-5</a>           | <i>Nat Commun</i> , 2021, <b>12</b> , 4143.                |
| <i>Co-Fe-S NFs@MS/NF</i>                                   | 281 at 100 mA cm <sup>-2</sup> | <a href="https://doi.org/10.1016/j.electacta.2020.137038">https://doi.org/10.1016/j.electacta.2020.137038</a> | <i>Electrochim Acta</i> , 2020, <b>361</b> , 137038        |
| <i>Fe-doped NiSe NSs/CNTs</i>                              | 282.7                          | <a href="https://doi.org/10.1039/D1TA07393A">https://doi.org/10.1039/D1TA07393A</a>                           | <i>J Mater Chem A Mater</i> , 2022, <b>10</b> , 3102–3111. |
| <i>CoPx@FeOOH</i>                                          | 283 at 100 mA cm <sup>-2</sup> | <a href="https://doi.org/10.1016/j.apcatb.2021.120256">https://doi.org/10.1016/j.apcatb.2021.120256</a>       | <i>Appl Catal B</i> , 2021, <b>294</b> , 120256.           |
| <i>Co(OH)<sub>x</sub>/Ag/Co(OH)<sub>2</sub></i>            | 283                            | <a href="https://doi.org/10.1016/j.jallcom.2021.161674">https://doi.org/10.1016/j.jallcom.2021.161674</a>     | <i>J Alloys Compd</i> , 2021, <b>889</b> , 161674.         |
| <i>CCHH/MWCNT</i>                                          | 285                            | <a href="https://doi.org/10.1016/j.jpowsour.2014.12.092">https://doi.org/10.1016/j.jpowsour.2014.12.092</a>   | <i>Power Sources</i> , 2015, <b>278</b> , 464–472          |
| <i>ZIF-67@CNT</i>                                          | 285                            | <a href="https://doi.org/10.1016/j.electacta.2022.141593">https://doi.org/10.1016/j.electacta.2022.141593</a> | <i>Electrochim Acta</i> , 2023, <b>439</b> , 141593.       |
| <i>Fe<sub>59</sub>Co<sub>41</sub></i>                      | 285                            | <a href="https://doi.org/10.1016/j.apsusc.2022.141593">https://doi.org/10.1016/j.apsusc.2022.141593</a>       | <i>Appl Surf</i>                                           |

|                                                      |                                         |                                                                                                             |                                                                             |
|------------------------------------------------------|-----------------------------------------|-------------------------------------------------------------------------------------------------------------|-----------------------------------------------------------------------------|
|                                                      |                                         | 153041                                                                                                      | <i>Sci</i> , 2022,<br><b>589</b> , 153041                                   |
| $Co_{0.6}Fe_{0.2}W_{0.2}S_{\delta}$                  | 286                                     | <a href="https://doi.org/10.1002/sml.202107249">https://doi.org/10.1002/sml.202107249</a>                   | <i>Small</i> , 2022,<br><b>18</b> , 2107249                                 |
| $Co/CoTe_2-240$                                      | 286                                     | <a href="https://doi.org/10.1039/d0qi00372g">https://doi.org/10.1039/d0qi00372g</a>                         | <i>Inorg Chem Front</i> , 2020,<br><b>7</b> , 2523–<br>2532.                |
| $N-Ni_1Co_4-S$                                       | 286.2                                   | <a href="https://doi.org/10.1016/j.apsusc.2022.153173">https://doi.org/10.1016/j.apsusc.2022.153173</a>     | <i>Appl Surf Sci</i> , 2022,<br><b>591</b> , 153173.                        |
| $CuCo_2O_4/CC$                                       | 288                                     | <a href="https://doi.org/10.1016/j.jcis.2020.04.100">https://doi.org/10.1016/j.jcis.2020.04.100</a>         | <i>J Colloid Interface Sci</i> ,<br>2020, <b>576</b> ,<br>476–485.          |
| $CuS@15\%AgInSe_2-NF$                                | 289                                     | <a href="https://doi.org/10.1016/j.ceramint.2024.01.197">https://doi.org/10.1016/j.ceramint.2024.01.197</a> | <i>Ceram Int</i> ,<br>2024, <b>50</b> ,<br>12905–<br>12914                  |
| $CNT-CoS_2$                                          | 290                                     | <a href="https://doi.org/10.1039/c7nr01293d">https://doi.org/10.1039/c7nr01293d</a>                         | <i>Nanoscale</i> ,<br>2017, <b>9</b> ,<br>6886–6894                         |
| $(Ni-Fe)_S_x/NiFe(OH)_y$                             | 290 at 100<br>mA cm <sup>-2</sup>       | <a href="https://doi.org/10.1016/j.apcatb.2019.01.082">https://doi.org/10.1016/j.apcatb.2019.01.082</a>     | <i>Appl Catal B</i> ,<br>2019, <b>246</b> ,<br>337–348.                     |
| $6MIM-MoCo$                                          | 290                                     | <a href="https://doi.org/10.1002/cssc.202101666">https://doi.org/10.1002/cssc.202101666</a>                 | <i>ChemSusChem</i> , 2021, <b>15</b> ,<br>e202101666                        |
| $Re/ReS_2-7H/CC$                                     | 290                                     | <a href="https://doi.org/10.1002/sml.202003007">https://doi.org/10.1002/sml.202003007</a>                   | <i>Small</i> 2020,<br><b>16</b> , 2003007                                   |
| $FeVO_x/NP$                                          | 290 mV at<br>500 mA<br>cm <sup>-2</sup> | <a href="https://doi.org/10.1021/jacs.3c02288">https://doi.org/10.1021/jacs.3c02288</a>                     | <i>J Am Chem Soc</i> , 2023,<br><b>145</b> , 12206–<br>12213.               |
| $PrBa_{0.5}Sr_{0.5}Co_{2-x}Fe_xO_{5+\delta}$ (PBSCF) | 290                                     | <a href="https://doi.org/10.1039/D1TA08445C">https://doi.org/10.1039/D1TA08445C</a>                         | <i>J Mater Chem A</i><br><i>Mater</i> , 2022,<br><b>10</b> , 2271–<br>2279. |
| $Fe-SAC@COF$                                         | 290                                     | <a href="https://doi.org/10.1016/j.xpro.2022.101626">https://doi.org/10.1016/j.xpro.2022.101626</a>         | <i>STAR Protoc</i> , 2022,<br><b>3</b> , 101626.                            |
| $P-NiO/NiCo_2O_4$                                    | 290                                     | <a href="https://doi.org/10.1016/j.jallcom.2022.166338">https://doi.org/10.1016/j.jallcom.2022.166338</a>   | <i>J Alloys Compd</i> ,<br>2022, <b>925</b> ,<br>166338.                    |



|                           |                                |                                                                                                               |                                                                                |
|---------------------------|--------------------------------|---------------------------------------------------------------------------------------------------------------|--------------------------------------------------------------------------------|
| $FeCoNiMnOOH$             | 291 at 100 mA cm <sup>-2</sup> | <a href="https://doi.org/10.1016/j.jclepro.2022.131680">https://doi.org/10.1016/j.jclepro.2022.131680</a>     | <i>J Clean Prod</i> , 2022, <b>356</b> , 131680.                               |
| $Ni_{0.26}Co_{0.74}Se/NF$ | 291 at 50 mA cm <sup>-2</sup>  | <a href="https://doi.org/10.1016/j.jpccs.2020.109658">https://doi.org/10.1016/j.jpccs.2020.109658</a>         | <i>Journal of Physics and Chemistry of Solids</i> , 2021, <b>148</b> , 109658. |
| $Ni_{0.26}Co_{0.74}Se/NF$ | 291 at 50 mA cm <sup>-2</sup>  | <a href="https://doi.org/10.1016/j.jpccs.2020.109658">https://doi.org/10.1016/j.jpccs.2020.109658</a>         | <i>Journal of Physics and Chemistry of Solids</i> , 2021, <b>148</b> , 109658  |
| $NiCo-Bpy-BTC$            | 292                            | <a href="https://doi.org/10.1016/j.electacta.2022.141714">https://doi.org/10.1016/j.electacta.2022.141714</a> | <i>Electrochim Acta</i> , 2023, <b>439</b> , 141714.                           |
| $CoCr_2O_4$               | 293                            | <a href="https://doi.org/10.1021/acs.inorgchem.2c03840">https://doi.org/10.1021/acs.inorgchem.2c03840</a>     | <i>Inorg Chem</i> , 2023, <b>62</b> , 2726–2737.                               |
| $CoFe(OH)_x-2$            | 293                            | <a href="https://doi.org/10.1039/c9cy02092f">https://doi.org/10.1039/c9cy02092f</a>                           | <i>Catal Sci Technol</i> , 2020, <b>10</b> , 215–221                           |
| $W_{0.1}Ni(OH)_2/NiOOH$   | 293 at 50 mA cm <sup>-2</sup>  | <a href="https://doi.org/10.1021/acsanm.1c04359">https://doi.org/10.1021/acsanm.1c04359</a>                   | <i>ACS Appl Nano Mater</i> , 2022, <b>5</b> , 2664–2677                        |
| $Co-Fe-O-B-10$            | 294                            | <a href="https://dx.doi.org/10.1021/acsaem.0c01040">https://dx.doi.org/10.1021/acsaem.0c01040</a>             | <i>ACS Appl Energy Mater</i> , 2020, <b>3</b> , 7619–7628.                     |
| $Co_{3-x}Fe_xO_4-0.01$    | 294                            | <a href="https://doi.org/10.1039/D1DT03936A">https://doi.org/10.1039/D1DT03936A</a>                           | <i>Dalton Transactions</i> , 2022, <b>51</b> , 3137–3145.                      |
| $HN-Ru/RuO_2$             | 295                            | <a href="https://doi.org/10.1039/d3na00899a">https://doi.org/10.1039/d3na00899a</a>                           | <i>Nanoscale Adv</i> , 2024, <b>6</b> , 867–875                                |
| $CoWO_{4-x}/C$            | 295                            | <a href="https://doi.org/10.1016/j.apcatb.2019.118090">https://doi.org/10.1016/j.apcatb.2019.118090</a>       | <i>Appl Catal B</i> , 2019, <b>259</b> , 118090.                               |
| $NiCo_{2-x}Mn_xO_4$       | 296                            | <a href="https://doi.org/10.1039/d4ta02978j">https://doi.org/10.1039/d4ta02978j</a>                           | <i>J Mater Chem A Mater</i> , 2024, <b>12</b> , 21956–                         |

|                               |                                |                                                                                                             |                                                                                      |
|-------------------------------|--------------------------------|-------------------------------------------------------------------------------------------------------------|--------------------------------------------------------------------------------------|
|                               |                                |                                                                                                             | 21970                                                                                |
| $NiCrFeO_4$                   | 296                            | <a href="https://doi.org/10.1016/j.jiec.2021.06.015">https://doi.org/10.1016/j.jiec.2021.06.015</a>         | <i>Journal of Industrial and Engineering Chemistry</i> , 2021, <b>101</b> , 178–185. |
| $Fe-Co-S/Cu_2O/Cu$            | 297 at 20 mA cm <sup>-2</sup>  | <a href="https://doi.org/10.1016/j.apsusc.2021.150757">https://doi.org/10.1016/j.apsusc.2021.150757</a>     | <i>Appl Surf Sci</i> , 2021, <b>567</b> , 150757.                                    |
| $Fe_{0.64}Ni_{0.36}$          | 298                            | <a href="https://doi.org/10.1016/j.cattod.2019.09.046">https://doi.org/10.1016/j.cattod.2019.09.046</a>     | <i>Catal Today</i> , 2020, <b>352</b> , 27–33                                        |
| $DO-IrTe_2$ HNSs              | 298                            | <a href="https://doi.org/10.1002/adfm.202004375">https://doi.org/10.1002/adfm.202004375</a>                 | <i>Adv Funct Mater</i> , 2020, <b>30</b> , 2004375                                   |
| $Cl$ -doped $\alpha-Co(OH)_2$ | 298                            | <a href="https://doi.org/10.1039/c9dt02141h">https://doi.org/10.1039/c9dt02141h</a>                         | <i>Dalton Transactions</i> , 2019, <b>48</b> , 12127–12136.                          |
| $SnCo_2O_4/rGO$               | 299                            | <a href="https://doi.org/10.1016/j.ijhydene.2023.06.238">https://doi.org/10.1016/j.ijhydene.2023.06.238</a> | <i>Int J Hydrogen Energy</i> , 2024, <b>51</b> , 436–447                             |
| $RGO-ZnCo_2O_4$               | 300                            | <a href="https://doi.org/10.1016/j.ijhydene.2018.11.163">https://doi.org/10.1016/j.ijhydene.2018.11.163</a> | <i>Int J Hydrogen Energy</i> , 2019, <b>44</b> , 1565–1578                           |
| $Ni_2(dtbh-PLY)_2$            | 300                            | <a href="https://doi.org/10.1021/acs.inorgchem.4c00078">https://doi.org/10.1021/acs.inorgchem.4c00078</a>   | <i>Inorg Chem</i> , 2024, <b>63</b> , 9771–9785.                                     |
| $MnFeCoNi$                    | 302                            | <a href="https://doi.org/10.1016/j.jpowsour.2019.05.030">https://doi.org/10.1016/j.jpowsour.2019.05.030</a> | <i>J Power Sources</i> , 2019, <b>430</b> , 104–111                                  |
| $Cu-Zn-Ag$                    | 303 at 1.0 mA cm <sup>-2</sup> | <a href="https://doi.org/10.1002/er.5989">https://doi.org/10.1002/er.5989</a>                               | <i>Int J Energy Res</i> , 2021, <b>45</b> , 2931–2944                                |
| $CoS_x/FeS_x$                 | 304                            | <a href="https://dx.doi.org/10.1021/acscatal.9b05170">https://dx.doi.org/10.1021/acscatal.9b05170</a>       | <i>ACS Catal</i> , 2020, <b>10</b> , 1855–1864.                                      |

|                                         |                                |                                                                                                               |                                                                               |
|-----------------------------------------|--------------------------------|---------------------------------------------------------------------------------------------------------------|-------------------------------------------------------------------------------|
| <i>NiSe/NF</i>                          | 306 at 100 mA cm <sup>-2</sup> | <a href="https://doi.org/10.1016/j.electacta.2019.135549">https://doi.org/10.1016/j.electacta.2019.135549</a> | <i>Electrochim Acta</i> , 2020, <b>334</b> , 135549.                          |
| <i>CoO/NF</i>                           | 307                            | <a href="https://doi.org/10.1016/j.ijhydene.2020.01.085">https://doi.org/10.1016/j.ijhydene.2020.01.085</a>   | <i>Int J Hydrogen Energy</i> , 2020, <b>45</b> , 8031–8040.                   |
| <i>Co3O4@MWCNT</i>                      | 309                            | <a href="https://doi.org/10.1039/c4ta04641b">https://doi.org/10.1039/c4ta04641b</a>                           | <i>J Mater Chem A Mater</i> , 2015, <b>3</b> , 1761–1768                      |
| <i>NiDHBT films</i>                     | 310 at 250 mA cm <sup>-2</sup> | <a href="http://dx.doi.org/10.1021/acsaem.9b00860">http://dx.doi.org/10.1021/acsaem.9b00860</a>               | <i>ACS Appl Energy Mater</i> , 2019, <b>2</b> , 5734–5743.                    |
| <i>MnFe<sub>2</sub>O<sub>4</sub>/NF</i> | 310                            | <a href="https://doi.org/10.1016/j.apsusc.2021.149124">https://doi.org/10.1016/j.apsusc.2021.149124</a>       | <i>Appl Surf Sci</i> , 2021, <b>546</b> , 149124.                             |
| <i>CoCO<sub>3</sub> PNSs</i>            | 310                            | <a href="https://doi.org/10.1016/j.cej.2020.128066">https://doi.org/10.1016/j.cej.2020.128066</a>             | <i>Chemical Engineering Journal</i> , 2021, <b>417</b> , 128066.              |
| <i>5%Ru-CoPO</i>                        | 310                            | <a href="https://doi.org/10.1016/j.mtchem.2022.101267">https://doi.org/10.1016/j.mtchem.2022.101267</a>       | <i>Mater Today Chem</i> , 2022, <b>26</b> , 101267.                           |
| <i>NrN@Ni</i>                           | 313                            | <a href="https://doi.org/10.1007/s10008-019-04299-1">https://doi.org/10.1007/s10008-019-04299-1</a>           | <i>Journal of Solid State Electrochemistry</i> , 2019, <b>23</b> , 2051–2060. |
| <i>NiFeP-Composite</i>                  | 313                            | <a href="https://doi.org/10.1002/er.8710">https://doi.org/10.1002/er.8710</a>                                 | <i>Int J Energy Res</i> , 2022, <b>46</b> , 22078–22088.                      |
| <i>NiO-D2</i>                           | 314                            | <a href="https://doi.org/10.1039/d2se00829g">https://doi.org/10.1039/d2se00829g</a>                           | <i>Sustain Energy Fuels</i> , 2022, <b>6</b> , 4498–4505.                     |
| <i>Co<sub>3</sub>Mo<sub>3</sub>C/N</i>  | 316                            | <a href="https://doi.org/10.1016/j.ijhydene.2021.04.084">https://doi.org/10.1016/j.ijhydene.2021.04.084</a>   | <i>Int J Hydrogen</i>                                                         |

|                                                                        |                                   |                                                                                                             |                                                                               |
|------------------------------------------------------------------------|-----------------------------------|-------------------------------------------------------------------------------------------------------------|-------------------------------------------------------------------------------|
|                                                                        |                                   |                                                                                                             | <i>Energy</i> ,<br>2021, <b>46</b> ,<br>22268–<br>22276.                      |
| <i>O-Ni-Fe/200-3</i>                                                   | 318                               | <a href="https://doi.org/10.20517/energymater.2022.19">https://doi.org/10.20517/energymater.2022.19</a>     | <i>Energy Materials</i> ,<br>2022, <b>2</b> ,<br>200019                       |
| <i>Ni<sub>40</sub>Fe<sub>40</sub>B<sub>20</sub></i>                    | 319                               | <a href="https://doi.org/10.1016/j.ijhydene.2022.04.200">https://doi.org/10.1016/j.ijhydene.2022.04.200</a> | <i>Int J Hydrogen Energy</i> ,<br>2022, <b>47</b> ,<br>20718–<br>20728.       |
| <i>Co-Fe</i>                                                           | 319                               | <a href="https://doi.org/10.1021/jacs.3c08099">https://doi.org/10.1021/jacs.3c08099</a>                     | <i>J Am Chem Soc</i> , 2023,<br><b>145</b> , 23691–<br>23701                  |
| <i>Ru/RuO<sub>2</sub>-200</i>                                          | 320                               | <a href="https://doi.org/10.1002/eem2.12031">https://doi.org/10.1002/eem2.12031</a>                         | <i>ENERGY &amp; ENVIRONMENTAL MATERIALS</i> ,<br>2019, <b>2</b> ,<br>201–208. |
| <i>Zn<sub>0.4</sub>Mn<sub>0.6</sub>Co<sub>2</sub>O<sub>4</sub>/rGO</i> | 320                               | <a href="https://doi.org/10.1016/j.ijhydene.2020.03.231">https://doi.org/10.1016/j.ijhydene.2020.03.231</a> | <i>Int J Hydrogen Energy</i> ,<br>2020, <b>45</b> ,<br>14713–<br>14727.       |
| <i>HfNiSe<sub>2</sub>/rGO</i>                                          | 320 at 20<br>mA cm <sup>-2</sup>  | <a href="https://doi.org/10.1002/cctc.202300562">https://doi.org/10.1002/cctc.202300562</a>                 | <i>ChemCatChem</i> , 2023, <b>15</b> ,<br>e202300562                          |
| <i>HP Ni-P</i>                                                         | 323 at 100<br>mA cm <sup>-2</sup> | <a href="https://doi.org/10.1039/d0ta03739g">https://doi.org/10.1039/d0ta03739g</a>                         | <i>J Mater Chem A Mater</i> , 2020,<br><b>8</b> , 12069–<br>12079.            |
| <i>CoNi-PBA-2</i>                                                      | 326                               | <a href="https://doi.org/10.1021/acsami.1c10441">https://doi.org/10.1021/acsami.1c10441</a>                 | <i>ACS Appl Mater Interfaces</i> ,<br>2021, <b>13</b> ,<br>42715–<br>42723.   |
| <i>Co-COF@MOF</i>                                                      | 328                               | <a href="https://doi.org/10.1002/sml.202308598">https://doi.org/10.1002/sml.202308598</a>                   | <i>Small</i> , 2024,<br><b>20</b> , 2308598,                                  |

|                                                                  |                                |                                                                                                               |                                                                             |
|------------------------------------------------------------------|--------------------------------|---------------------------------------------------------------------------------------------------------------|-----------------------------------------------------------------------------|
|                                                                  |                                |                                                                                                               | 1- 8                                                                        |
| <i>A-CNT-CoSnS</i>                                               | 330                            | <a href="https://doi.org/10.1039/C9NR09588H">https://doi.org/10.1039/C9NR09588H</a>                           | <i>Nanoscale</i> , 2020, <b>12</b> , 3879–3887.                             |
| <i>a c-FeOOH</i>                                                 | 330 at 300 mA cm <sup>-2</sup> | <a href="https://doi.org/10.1002/cssc.202001229">https://doi.org/10.1002/cssc.202001229</a>                   | <i>ChemSusChem</i> , 2020, <b>13</b> , 4911–4915.                           |
| <i>Ir-SAs, Ir1/Ni<sub>1.6</sub>Mn<sub>1.4</sub>O<sub>4</sub></i> | 330 at 100 mA cm <sup>-2</sup> | <a href="https://doi.org/10.1002/advs.202200529">https://doi.org/10.1002/advs.202200529</a>                   | <i>Advanced Science</i> , 2022, <b>9</b> , 2200529                          |
| <i>Co<sub>3</sub>O<sub>4</sub>@KNbO<sub>3</sub></i>              | 330                            | <a href="https://doi.org/10.1016/j.matlet.2023.135178">https://doi.org/10.1016/j.matlet.2023.135178</a>       | <i>Mater Lett</i> , 2023, <b>352</b> , 135178.                              |
| <i>NiCoFe-rGO</i>                                                | 332                            | <a href="https://doi.org/10.1016/j.jcat.2019.08.006">https://doi.org/10.1016/j.jcat.2019.08.006</a>           | <i>J Catal</i> , 2019, <b>377</b> , 619–628.                                |
| <i>Rh(nP)/nC</i>                                                 | 333 at 5 mA cm <sup>-2</sup>   | <a href="https://doi.org/10.1039/d0nr05659f">https://doi.org/10.1039/d0nr05659f</a>                           | <i>Nanoscale</i> , 2020, <b>12</b> , 20165–20170.                           |
| <i>La<sub>0.7</sub>K<sub>0.3</sub>CoO<sub>3-δ</sub></i>          | 335                            | <a href="https://doi.org/10.1039/D2CP04708J">https://doi.org/10.1039/D2CP04708J</a>                           | <i>Physical Chemistry Chemical Physics</i> , 2022, <b>24</b> , 28584–28598. |
| <i>NiCo<sub>2</sub>O<sub>4</sub></i>                             | 340                            | <a href="https://doi.org/10.1039/c4dt03803g">https://doi.org/10.1039/c4dt03803g</a>                           | <i>Dalton Transactions</i> , 2015, <b>44</b> , 4148–4154                    |
| <i>Fe(ox)(H<sub>2</sub>O)<sub>2</sub>/NF(-1.4)-15</i>            | 340 at 100 mA cm <sup>-2</sup> | <a href="https://doi.org/10.1021/acs.inorgchem.1c00170">https://doi.org/10.1021/acs.inorgchem.1c00170</a>     | <i>Inorg Chem</i> , 2021, <b>60</b> , 5140–5152                             |
| <i>NiFe<sub>2</sub>O<sub>4</sub>/CC</i>                          | 340                            | <a href="https://doi.org/10.1016/j.electacta.2019.134883">https://doi.org/10.1016/j.electacta.2019.134883</a> | <i>Electrochim Acta</i> , 2019, <b>324</b> , 134883.                        |
| <i>NiCo<sub>2</sub>O<sub>4</sub></i>                             | 340                            | <a href="https://doi.org/10.1021/acsami.3c01196">https://doi.org/10.1021/acsami.3c01196</a>                   | <i>ACS Appl Mater Interfaces</i> , 2023, <b>15</b> , 26093–26103.           |
| <i>NiO_200 nm</i>                                                | 345                            | <a href="https://doi.org/10.1039/D0MA00467G">https://doi.org/10.1039/D0MA00467G</a>                           | <i>Mater Adv</i> , 2020, <b>1</b> ,                                         |

|                                                     |                                |                                                                                                               |                                                                                    |
|-----------------------------------------------------|--------------------------------|---------------------------------------------------------------------------------------------------------------|------------------------------------------------------------------------------------|
|                                                     |                                |                                                                                                               | 1971–1979.                                                                         |
| CC/NCL-75                                           | 350                            | <a href="https://doi.org/10.1016/j.jpowsour.2021.229468">https://doi.org/10.1016/j.jpowsour.2021.229468</a>   | <i>J Power Sources</i> , 2021, 488, 229468.                                        |
| evo-FeOOH                                           | 350                            | <a href="https://doi.org/10.1002/sml.202301715">https://doi.org/10.1002/sml.202301715</a>                     | <i>Small</i> , 2023, <b>19</b> , 2301715                                           |
| CoPO                                                | 350                            | <a href="https://doi.org/10.1002/cctc.201901803">https://doi.org/10.1002/cctc.201901803</a>                   | <i>ChemCatChem</i> , 2020, <b>12</b> , 2091–2096.                                  |
| FeCoNi-ATNs (H)/NF                                  | 350 at 400 mA cm <sup>-2</sup> | <a href="https://doi.org/10.1002/aenm.201901312">https://doi.org/10.1002/aenm.201901312</a>                   | <i>Adv Energy Mater</i> , 2019, <b>9</b> , 1901312                                 |
| Co-H/NiCo@NF                                        | 350 at 100 mA cm <sup>-2</sup> | <a href="https://doi.org/10.1002/admi.202202349">https://doi.org/10.1002/admi.202202349</a>                   | <i>Adv Mater Interfaces</i> , 2023, <b>10</b> , 2202349                            |
| (CoP@NG)                                            | 354                            | <a href="https://doi.org/10.1016/j.electacta.2019.03.208">https://doi.org/10.1016/j.electacta.2019.03.208</a> | <i>Electrochim Acta</i> , 2019, <b>307</b> , 543–552.                              |
| CuO/Ni@400                                          | 364                            | <a href="https://doi.org/10.1016/j.jiec.2019.04.019">https://doi.org/10.1016/j.jiec.2019.04.019</a>           | <i>Journal of Industrial and Engineering Chemistry</i> , 2019, <b>76</b> , 515–523 |
| MAC                                                 | 366                            | <a href="https://doi.org/10.1039/c6ra19333a">https://doi.org/10.1039/c6ra19333a</a>                           | <i>RSC Adv</i> , 2016, <b>6</b> , 102422–102427                                    |
| NiCu@NiCuOOH-NF                                     | 366                            | <a href="https://doi.org/10.1016/j.ijhydene.2022.03.139">https://doi.org/10.1016/j.ijhydene.2022.03.139</a>   | <i>Int J Hydrogen Energy</i> , 2022, <b>47</b> , 16080–16091.                      |
| NiFe <sub>2</sub> O <sub>4</sub> /CuWO <sub>4</sub> | 370                            | <a href="https://doi.org/10.1039/d4cp00473f">https://doi.org/10.1039/d4cp00473f</a>                           | <i>Physical Chemistry Chemical Physics</i> , 2024, <b>26</b> , 14883–14897         |
| FeNi (1:1)                                          | 370 at 5                       | <a href="https://doi.org/10.1002/celec.20190048">https://doi.org/10.1002/celec.20190048</a>                   | <i>ChemElectro</i>                                                                 |

|                                                                                                         |                                |   |                                                                                                                 |                                                                                               |
|---------------------------------------------------------------------------------------------------------|--------------------------------|---|-----------------------------------------------------------------------------------------------------------------|-----------------------------------------------------------------------------------------------|
|                                                                                                         | mA cm <sup>-2</sup>            | 3 |                                                                                                                 | <i>Chem</i> , 2019, <b>6</b> , 3478–3487.                                                     |
| <i>NiSn(OH)<sub>6</sub>@OOH</i>                                                                         | 370                            |   | <a href="https://doi.org/10.1039/D1TA08531J">https://doi.org/10.1039/D1TA08531J</a>                             | <i>J Mater Chem A Mater</i> , 2022, <b>10</b> , 1369–1379.                                    |
| <i>CoMnNiS</i>                                                                                          | 371                            |   | <a href="https://doi.org/10.1007/s10854-021-05860-3">https://doi.org/10.1007/s10854-021-05860-3</a>             | <i>Journal of Materials Science: Materials in Electronics</i> , 2021, <b>32</b> , 12292–12307 |
| <i>α-CoGd(OH)<sub>2</sub>/FTO</i>                                                                       | 371                            |   | <a href="https://doi.org/10.1039/D4NR01743A">https://doi.org/10.1039/D4NR01743A</a>                             | <i>Nanoscale</i> , 2024, <b>16</b> , 15629–15639.                                             |
| <i>NiCo-MOF@NiSb@GB</i>                                                                                 | 379 at 100 mA cm <sup>-2</sup> |   | <a href="https://doi.org/10.1021/acsami.3c03021">https://doi.org/10.1021/acsami.3c03021</a>                     | <i>ACS Appl Mater Interfaces</i> , 2023, <b>15</b> , 34682–34697                              |
| <i>(Ba<sub>0.5</sub>Sr<sub>0.5</sub>)<sub>1-x</sub>Co<sub>0.8</sub>Fe<sub>0.2</sub>O<sub>0.05</sub></i> | 380                            |   | <a href="https://doi.org/10.1002/cjoc.202100215">https://doi.org/10.1002/cjoc.202100215</a>                     | <i>Chin J Chem</i> , 2021, <b>39</b> , 2692–2698                                              |
| <i>porous Co-P</i>                                                                                      | 380                            |   | <a href="https://dx.doi.org/10.1021/acssuschemeng.0c02671">https://dx.doi.org/10.1021/acssuschemeng.0c02671</a> | <i>ACS Sustain Chem Eng</i> , 2020, <b>8</b> , 10193–10200.                                   |
| <i>FeCoNiB@B-VG</i>                                                                                     | 387                            |   | <a href="https://doi.org/10.1016/j.electacta.2021.138459">https://doi.org/10.1016/j.electacta.2021.138459</a>   | <i>Electrochim Acta</i> , 2021, <b>386</b> , 138459.                                          |
| <i>AgNPs@SBA-NH<sub>2</sub></i>                                                                         | 390                            |   | <a href="https://doi.org/10.1039/c8dt04159h">https://doi.org/10.1039/c8dt04159h</a>                             | <i>Dalton Transactions</i> , 2019, <b>48</b> , 2220–2227                                      |
| <i>NiOOH-MnOOH/NF</i>                                                                                   | 391 at 100 mA cm <sup>-2</sup> |   | <a href="https://doi.org/10.1039/D4QM00512K">https://doi.org/10.1039/D4QM00512K</a>                             | <i>Mater Chem Front</i> , 2024, <b>8</b> , 3290–3299.                                         |
| <i>Ba<sub>0.5</sub>Sr<sub>0.5</sub>CoO<sub>3</sub></i>                                                  | 395                            |   | <a href="https://doi.org/10.1021/acs.energyfuel">https://doi.org/10.1021/acs.energyfuel</a>                     | <i>Energy &amp;</i>                                                                           |

|                     |                              |                                                                                                               |                                                              |
|---------------------|------------------------------|---------------------------------------------------------------------------------------------------------------|--------------------------------------------------------------|
|                     |                              | s.2c00357                                                                                                     | <i>Fuels</i> , 2022, <b>36</b> , 3219–3228.                  |
| $Ni_xCo_{1-x}O_y$   | 404                          | <a href="https://doi.org/10.1039/d1ra07304d">https://doi.org/10.1039/d1ra07304d</a>                           | <i>RSC Adv</i> , 2022, <b>12</b> , 1694–1703                 |
| $Fe_3C@C/CNT$       | 407                          | <a href="https://doi.org/10.1021/acs.energyfuels.3c01711">https://doi.org/10.1021/acs.energyfuels.3c01711</a> | <i>Energy &amp; Fuels</i> , 2023, <b>37</b> , 13260–13270.   |
| $AgNW@Cu_2O$        | 409                          | <a href="https://doi.org/10.1039/d4na00364k">https://doi.org/10.1039/d4na00364k</a>                           | <i>Nanoscale Adv</i> , 2024, <b>6</b> , 4426–4433            |
| $Co_3O_4$           | 409                          | <a href="https://doi.org/10.1016/j.jallcom.2020.154919">https://doi.org/10.1016/j.jallcom.2020.154919</a>     | <i>J Alloys Compd</i> , 2020, <b>836</b> , 154919            |
| $S0.95NCF$          | 420 at 5 mA cm <sup>-2</sup> | <a href="https://doi.org/10.1016/j.electacta.2017.10.172">https://doi.org/10.1016/j.electacta.2017.10.172</a> | <i>Electrochim Acta</i> , 2018, <b>259</b> , 1004–1010       |
| <i>Co Coating</i>   | 438                          | <a href="https://doi.org/10.3390/ma14010092">https://doi.org/10.3390/ma14010092</a>                           | <i>Materials</i> , 2020, <b>14</b> , 92.                     |
| $MnO_2-Ni\ 0.02(M)$ | 445                          | <a href="https://doi.org/10.1021/acs.inorgchem.1c03236">https://doi.org/10.1021/acs.inorgchem.1c03236</a>     | <i>Inorg Chem</i> , 2021, <b>60</b> , 19429–19439.           |
| $Ni_{0.3}Co_{0.7}O$ | 450                          | <a href="https://doi.org/10.1039/d0ra03050c">https://doi.org/10.1039/d0ra03050c</a>                           | <i>RSC Adv</i> , 2020, <b>10</b> , 17845–17853               |
| $Cu-EA$             | 470                          | <a href="https://doi.org/10.1039/c6cc00526h">https://doi.org/10.1039/c6cc00526h</a>                           | <i>Chemical Communications</i> , 2016, <b>52</b> , 5546–5549 |
| $rGO/CoMoO_4$       | 475                          | <a href="https://doi.org/10.1002/celec.201900055">https://doi.org/10.1002/celec.201900055</a>                 | <i>ChemElectro Chem</i> , 2019, <b>6</b> , 2524–2530         |
| $Li-bir/rGO$        | 490                          | <a href="http://dx.doi.org/10.1149/2.0901908jes">http://dx.doi.org/10.1149/2.0901908jes</a>                   | <i>Soc</i> , 2019, <b>166</b> , A1543–A1549.                 |
| $Gr/AME-Ni\ Fe10\%$ | 519                          | <a href="https://doi.org/10.1002/celec.201901541">https://doi.org/10.1002/celec.201901541</a>                 | <i>ChemElectro Chem</i> , 2019, <b>6</b> , 5633–             |



|                |     |                                                                                             |                                                               |
|----------------|-----|---------------------------------------------------------------------------------------------|---------------------------------------------------------------|
| <i>CWO-NPs</i> | 570 | <a href="https://doi.org/10.1002/celc.201801196">https://doi.org/10.1002/celc.201801196</a> | 5641.<br><i>ChemElectro Chem</i> , 2018, <b>5</b> , 3938–3945 |
|                |     |                                                                                             |                                                               |

**Table S2:** Recently reported OER overpotentials measured for the current density of 10 mA cm<sup>-2</sup> (unless otherwise specified) against Ag/AgCl reference electrode for various catalysts listed in Figure 2a and Figure 2b (in main text) in 1.0 M KOH since 2019.

| <i>Catalyst</i>                        | $\eta^{10}/mV$                 | <i>DOI</i>                                                                                                        | <i>Bibliography</i>                                         |
|----------------------------------------|--------------------------------|-------------------------------------------------------------------------------------------------------------------|-------------------------------------------------------------|
| <i>CuCo/CP</i>                         | 80                             | <a href="https://doi.org/10.1016/j.molliq.2022.118635">https://doi.org/10.1016/j.molliq.2022.118635</a>           | <i>J Mol Liq</i> , 2022, <b>351</b> , 118635                |
| <i>MCC@Ag_45W</i>                      | 83                             | <a href="https://pubs.acs.org/doi/10.1021/acsaem.2c03455">https://pubs.acs.org/doi/10.1021/acsaem.2c03455</a>     | <i>ACS Appl Energy Mater</i> , 2023, <b>6</b> , 2286–2295   |
| <i>NiSe/NF</i>                         | 136 at 100 mA cm <sup>-2</sup> | <a href="http://dx.doi.org/10.1016/j.electacta.2016.12.070">http://dx.doi.org/10.1016/j.electacta.2016.12.070</a> | <i>Electrochim Acta</i> , 2017, <b>224</b> , 412–418        |
| <i>MnFeO-NF-0.4</i>                    | 157                            | <a href="https://doi.org/10.1039/d0nr05864e">https://doi.org/10.1039/d0nr05864e</a>                               | <i>Nanoscale</i> , 2020, <b>12</b> , 19992–20001            |
| <i>NiFeCoMnAl</i>                      | 190                            | <a href="https://doi.org/10.1016/j.apcatb.2021.120764">https://doi.org/10.1016/j.apcatb.2021.120764</a>           | <i>Appl Catal B</i> , 2022, <b>301</b> , 120764             |
| <i>Ag<sub>2</sub>Se/rGO</i>            | 192                            | <a href="https://doi.org/10.1016/j.jallcom.2024.174626">https://doi.org/10.1016/j.jallcom.2024.174626</a>         | <i>J Alloys Compd</i> , 2024, <b>993</b> , 174626           |
| <i>V-NiFe-LDH/NF</i>                   | 195                            | <a href="https://doi.org/10.1039/d0dt01520b">https://doi.org/10.1039/d0dt01520b</a>                               | <i>Dalton Transactions</i> , 2020, <b>49</b> , 11217–11225  |
| <i>NiFe-LDH/N10TC/NF</i>               | 196                            | <a href="https://doi.org/10.1002/cssc.202100043">https://doi.org/10.1002/cssc.202100043</a>                       | <i>ChemSusChem</i> , 2021, <b>14</b> , 1948–1954            |
| <i>FeCoPd</i>                          | 197                            | <a href="https://doi.org/10.1039/d2ta04436f">https://doi.org/10.1039/d2ta04436f</a>                               | <i>J Mater Chem A Mater</i> , 2022, <b>10</b> , 23731–23743 |
| <i>FeS-RGS NF</i>                      | 200                            | <a href="https://doi.org/10.1039/d1nr04138j">https://doi.org/10.1039/d1nr04138j</a>                               | <i>Nanoscale</i> , 2021, <b>13</b> , 14837–14846            |
| <i>CuCo<sub>2</sub>B</i>               | 204 at 100 mA cm <sup>-2</sup> | <a href="https://doi.org/10.1021/acssuschemeng.2c06708">https://doi.org/10.1021/acssuschemeng.2c06708</a>         | <i>ACS Sustain Chem Eng</i> , 2023, <b>11</b> , 2541–2553   |
| <i>Ni<sub>3</sub>Te<sub>2</sub>-Au</i> | 210                            | <a href="https://doi.org/10.1039/c8ta01760c">https://doi.org/10.1039/c8ta01760c</a>                               | <i>J Mater Chem A</i>                                       |

|                                                          |                               |                                                                                                               |                                                                 |
|----------------------------------------------------------|-------------------------------|---------------------------------------------------------------------------------------------------------------|-----------------------------------------------------------------|
|                                                          |                               |                                                                                                               | <i>Mater</i> , 2018, <b>6</b> , 7608–7622                       |
| <i>FeNiSSe</i>                                           | 213                           | <a href="https://doi.org/10.1016/j.jallcom.2020.156736">https://doi.org/10.1016/j.jallcom.2020.156736</a>     | <i>J Alloys Compd</i> , 2021, <b>852</b> , 156736               |
| <i>NiMo-Fe</i>                                           | 217                           | <a href="https://doi.org/10.1016/j.apcatb.2022.121150">https://doi.org/10.1016/j.apcatb.2022.121150</a>       | <i>Appl Catal B</i> , 2022, <b>307</b> , 121150                 |
| <i>Ni<sub>3.2</sub>Co<sub>4.2</sub>MnP<sub>6.5</sub></i> | 218 at 50 mA cm <sup>-2</sup> | <a href="https://doi.org/10.1039/d4ee00042k">https://doi.org/10.1039/d4ee00042k</a>                           | <i>Energy Environ Sci</i> , 2024, <b>17</b> , 5200–5215         |
| <i>NiFe-LDH/Raney-Ni</i>                                 | 219                           | <a href="https://doi.org/10.1016/j.apcata.2024.119858">https://doi.org/10.1016/j.apcata.2024.119858</a>       | <i>Appl Catal A Gen</i> , 2024, <b>683</b> , 119858             |
| <i>Fe-Co(OH)<sub>2</sub>/Fe<sub>2</sub>O<sub>3</sub></i> | 219                           | <a href="https://doi.org/10.1002/adfm.202305243">https://doi.org/10.1002/adfm.202305243</a>                   | <i>Adv Funct Mater</i> , 2023, <b>33</b> , 2305243              |
| <i>HS-Te-NiCo-LDH/NiO/NF</i>                             | 221                           | <a href="https://doi.org/10.1039/d1ma00688f">https://doi.org/10.1039/d1ma00688f</a>                           | <i>Mater Adv</i> , 2022, <b>3</b> , 1286–1294                   |
| <i>Ni-Fe-S</i>                                           | 223                           | <a href="https://doi.org/10.1039/d1nj02382a">https://doi.org/10.1039/d1nj02382a</a>                           | <i>New Journal of Chemistry</i> , 2021, <b>45</b> , 12996–13003 |
| <i>NiCo-LDH@FeOOH/CFP</i>                                | 224                           | <a href="https://doi.org/10.1016/j.nanoen.2019.104367">https://doi.org/10.1016/j.nanoen.2019.104367</a>       | <i>Nano Energy</i> , 2020, <b>69</b> , 104367                   |
| <i>rGO/SnTe</i>                                          | 226                           | <a href="https://doi.org/10.1002/er.8685">https://doi.org/10.1002/er.8685</a>                                 | <i>Int J Energy Res</i> , 2022, <b>46</b> , 24622–24632         |
| <i>NiFeCoPrO-Au/NF</i>                                   | 228 at 60 mA cm <sup>-2</sup> | <a href="http://dx.doi.org/10.1021/acs.inorgchem.9b02230">http://dx.doi.org/10.1021/acs.inorgchem.9b02230</a> | <i>Inorg Chem</i> , 2019, <b>58</b> , 15841–15852               |
| <i>NiFeMo/NF</i>                                         | 230 at 20 mA cm <sup>-2</sup> | <a href="https://doi.org/10.1016/j.electacta.2017.12.110">https://doi.org/10.1016/j.electacta.2017.12.110</a> | <i>Electrochim Acta</i> , 2018, <b>260</b> , 477–482            |
| <i>CCW-KOH-600</i>                                       | 230                           | <a href="https://doi.org/10.1016/j.chphi.2023.100175">https://doi.org/10.1016/j.chphi.2023.100175</a>         | <i>Chemical Physics Impact</i> , 2023, <b>6</b> , 100175        |
| <i>N-NiFe LDH</i>                                        | 230                           | <a href="https://doi.org/10.1002/aenm.201500936">https://doi.org/10.1002/aenm.201500936</a>                   | <i>Adv Energy Mater.</i> , 2015, <b>5</b> , 1500936             |
| <i>Ni<sub>4</sub> Mo/MoO<sub>2</sub> -550</i>            | 230                           | <a href="https://doi.org/10.1002/smtd.202201659">https://doi.org/10.1002/smtd.202201659</a>                   | <i>Small Methods</i> , 2023, <b>7</b> , 2201659                 |
| <i>CoFeWO<sub>x</sub></i>                                | 231                           | <a href="https://doi.org/10.1002/aenm.202002593">https://doi.org/10.1002/aenm.202002593</a>                   | <i>Adv Energy Mater</i> , 2020, <b>10</b> , 2002593             |
| <i>2h-Ni/NiO SPE</i>                                     | 231                           | <a href="https://doi.org/10.1039/d0ra10597j">https://doi.org/10.1039/d0ra10597j</a>                           | <i>RSC Adv</i> , 2021, <b>11</b> , 14654–                       |

|                                                     |                                      |                                                                                                               |                                                                 |
|-----------------------------------------------------|--------------------------------------|---------------------------------------------------------------------------------------------------------------|-----------------------------------------------------------------|
|                                                     |                                      |                                                                                                               | 14664                                                           |
| <i>CoP@a-CoOx</i>                                   | 232                                  | <a href="https://doi.org/10.1002/adv.201800514">https://doi.org/10.1002/adv.201800514</a>                     | <i>Advanced Science</i> , 2018, <b>5</b> , 1800514              |
| <i>ZnFe<sub>2</sub>O<sub>4</sub>@Zn(Fe)O<br/>OH</i> | 232                                  | <a href="https://doi.org/10.1002/celc.202000834">https://doi.org/10.1002/celc.202000834</a>                   | <i>ChemElectroChem</i> , 2020, <b>7</b> , 3478–3486             |
| <i>Cu@FeCN</i>                                      | 234 at 20<br>mA cm <sup>-2</sup>     | <a href="https://doi.org/10.1021/acs.energyfuels.3c03233">https://doi.org/10.1021/acs.energyfuels.3c03233</a> | <i>Energy &amp; Fuels</i> , 2023, <b>37</b> , 16588–16598       |
| <i>NiFe/TiO<sub>2</sub></i>                         | 240                                  | <a href="https://doi.org/10.1016/j.jallcom.2024.175729">https://doi.org/10.1016/j.jallcom.2024.175729</a>     | <i>J Alloys Compd</i> , 2024, <b>1004</b> , 175729              |
| <i>5%-Ir-MnO<sub>2</sub></i>                        | 240                                  | <a href="https://doi.org/10.1039/d2se00701k">https://doi.org/10.1039/d2se00701k</a>                           | <i>Sustainable Energy Fuels</i> , 2022, <b>6</b> , 3649–3657    |
| <i>FeNi/CoCH/Ni</i>                                 | 240 at 20<br>mA cm <sup>-2</sup>     | <a href="https://doi.org/10.1039/d1nr08035k">https://doi.org/10.1039/d1nr08035k</a>                           | <i>Nanoscale</i> , 2022, <b>14</b> , 3191–3199                  |
| <i>Te@FeOOH/NF</i>                                  | 241                                  | <a href="https://doi.org/10.1002/celc.202100703">https://doi.org/10.1002/celc.202100703</a>                   | <i>ChemElectroChem</i> , 2021, <b>8</b> , 3643–3650             |
| <i>FeOOH/Ni/NiO/TM</i>                              | 246 at 50<br>mA cm <sup>-2</sup>     | <a href="https://doi.org/10.1039/d4nj01114g">https://doi.org/10.1039/d4nj01114g</a>                           | <i>New Journal of Chemistry</i> , 2024, <b>48</b> , 9954–9960   |
| <i>n-MOF/CuO</i>                                    | 247                                  | <a href="https://doi.org/10.1016/j.fuel.2023.127638">https://doi.org/10.1016/j.fuel.2023.127638</a>           | <i>Fuel</i> , 2023, <b>341</b> , 127638                         |
| <i>MIL-88A/Ni(OH)<sub>2</sub>-<br/>CC</i>           | 250                                  | <a href="https://doi.org/10.1039/c9ta12865d">https://doi.org/10.1039/c9ta12865d</a>                           | <i>J Mater Chem A Mater</i> , 2020, <b>8</b> , 3311–3321        |
| <i>FeNiO<sub>x</sub>(OH)<sub>y-2</sub></i>          | 250                                  | <a href="https://doi.org/10.1016/j.jcis.2021.02.020">https://doi.org/10.1016/j.jcis.2021.02.020</a>           | <i>Colloid Interface Sci</i> , 2021, <b>591</b> , 307–313       |
| <i>NiCe@NiFe/NF-N</i>                               | 254 at<br>100 mA<br>cm <sup>-2</sup> | <a href="https://doi.org/10.1016/j.apcatb.2019.118199">https://doi.org/10.1016/j.apcatb.2019.118199</a>       | <i>Appl Catal B</i> , 2020, <b>260</b> , 118199                 |
| <i>FeOOH-NiCoMo<br/>LDH/NF</i>                      | 256 at 50<br>mA cm <sup>-2</sup>     | <a href="https://doi.org/10.1039/D2NJ00867J">https://doi.org/10.1039/D2NJ00867J</a>                           | <i>New Journal of Chemistry</i> , 2022, <b>46</b> , 7999–8009   |
| <i>CoGa LDH/SSM</i>                                 | 258                                  | <a href="https://doi.org/10.1002/smt.201800286">https://doi.org/10.1002/smt.201800286</a>                     | <i>Small Methods</i> , 2019, <b>3</b> , 1800286                 |
| <i>NiFe<sub>0.5</sub>Sn-A</i>                       | 260                                  | <a href="https://doi.org/10.1002/adv.201903777">https://doi.org/10.1002/adv.201903777</a>                     | <i>Advanced Science</i> , 2020, <b>7</b> , 1903777              |
| <i>FeNi-<br/>LDH/MOF/CC-36</i>                      | 263 at<br>100 mA<br>cm <sup>-2</sup> | <a href="https://doi.org/10.1016/j.cej.2024.152721">https://doi.org/10.1016/j.cej.2024.152721</a>             | <i>Chemical Engineering Journal</i> , 2024, <b>493</b> , 152721 |

|                                                                                                   |                                |                                                                                                             |                                                                 |
|---------------------------------------------------------------------------------------------------|--------------------------------|-------------------------------------------------------------------------------------------------------------|-----------------------------------------------------------------|
| <i>np-NiMnFeMo</i>                                                                                | 265                            | <a href="https://doi.org/10.1016/j.cej.2020.126530">https://doi.org/10.1016/j.cej.2020.126530</a>           | <i>Chemical Engineering Journal</i> , 2021, <b>404</b> , 126530 |
| <i>Te-Co<sub>3</sub>Se<sub>4</sub></i>                                                            | 269 at 50 mA cm <sup>-2</sup>  | <a href="https://doi.org/10.1016/j.jcis.2024.01.026">https://doi.org/10.1016/j.jcis.2024.01.026</a>         | <i>J Colloid Interface Sci</i> , 2024, <b>659</b> , 767–775     |
| <i>CuWO<sub>4</sub>@rGO</i>                                                                       | 270 at 1.0 mA cm <sup>-2</sup> | <a href="https://doi.org/10.1039/d1nj04617a">https://doi.org/10.1039/d1nj04617a</a>                         | <i>New Journal of Chemistry</i> , 2022, <b>46</b> , 1267–1272   |
| <i>La<sub>0.9</sub>Ce<sub>0.1</sub>NiO<sub>3</sub></i>                                            | 270                            | <a href="https://doi.org/10.1002/aenm.202003755">https://doi.org/10.1002/aenm.202003755</a>                 | <i>Adv Energy Mater</i> , 2021, <b>11</b> , 2003755             |
| <i>PtRu<sub>2</sub>/PF</i>                                                                        | 270                            | <a href="https://doi.org/10.1016/j.jcis.2021.01.049">https://doi.org/10.1016/j.jcis.2021.01.049</a>         | <i>J Colloid Interface Sci</i> , 2021, <b>590</b> , 154–163     |
| <i>NiFeCo/C</i>                                                                                   | 271                            | <a href="https://doi.org/10.1039/d1ta07591h">https://doi.org/10.1039/d1ta07591h</a>                         | <i>J Mater Chem A Mater</i> , 2021, <b>9</b> , 27034–27040      |
| <i>(Co<sub>0.21</sub>Ni<sub>0.25</sub>Cu<sub>0.54</sub>)<sub>3</sub>S<sub>e<sub>2</sub></sub></i> | 272                            | <a href="https://doi.org/10.1039/c9ta00863b">https://doi.org/10.1039/c9ta00863b</a>                         | <i>J Mater Chem A Mater</i> , 2019, <b>7</b> , 9877–9889        |
| <i>FN-2</i>                                                                                       | 275                            | <a href="https://doi.org/10.1002/sml.201903410">https://doi.org/10.1002/sml.201903410</a>                   | <i>Small</i> , 2019, <b>15</b> , 1903410                        |
| <i>SS Mesh</i>                                                                                    | 277                            | <a href="https://doi.org/10.1039/c9ra07258f">https://doi.org/10.1039/c9ra07258f</a>                         | <i>RSC Adv</i> , 2019, <b>9</b> , 31563–31571                   |
| <i>Co<sub>2</sub>C-NiTe/SS</i>                                                                    | 279                            | <a href="https://doi.org/10.1016/j.fuel.2024.132445">https://doi.org/10.1016/j.fuel.2024.132445</a>         | <i>Fuel</i> , 2024, <b>375</b> , 132445                         |
| <i>CCHH/MWCNT</i>                                                                                 | 285                            | <a href="https://doi.org/10.1016/j.jpowsour.2014.12.092">https://doi.org/10.1016/j.jpowsour.2014.12.092</a> | <i>Power Sources</i> , 2015, <b>278</b> , 464–472               |
| <i>Co<sub>0.6</sub>Fe<sub>0.2</sub>W<sub>0.2</sub>S<sub>δ</sub></i>                               | 286                            | <a href="https://doi.org/10.1002/sml.202107249">https://doi.org/10.1002/sml.202107249</a>                   | <i>Small</i> , 2022, <b>18</b> , 2107249                        |
| <i>CuS@15%AgInSe<sub>2</sub>-NF</i>                                                               | 289                            | <a href="https://doi.org/10.1016/j.ceramint.2024.01.197">https://doi.org/10.1016/j.ceramint.2024.01.197</a> | <i>Ceram Int</i> , 2024, <b>50</b> , 12905–12914                |
| <i>CNT-CoS<sub>2</sub></i>                                                                        | 290                            | <a href="https://doi.org/10.1039/c7nr01293d">https://doi.org/10.1039/c7nr01293d</a>                         | <i>Nanoscale</i> , 2017, <b>9</b> , 6886–6894                   |
| <i>CoFe(OH)<sub>x</sub>-2</i>                                                                     | 293                            | <a href="https://doi.org/10.1039/c9cy02092f">https://doi.org/10.1039/c9cy02092f</a>                         | <i>Catal Sci Technol</i> , 2020, <b>10</b> , 215–221            |
| <i>W<sub>0.1</sub>Ni(OH)<sub>2</sub>/NiOOH</i>                                                    | 293 at 50 mA cm <sup>-2</sup>  | <a href="https://doi.org/10.1021/acsanm.1c04359">https://doi.org/10.1021/acsanm.1c04359</a>                 | <i>ACS Appl Nano Mater</i> , 2022, <b>5</b> , 2664–2677         |
| <i>HN-Ru/RuO<sub>2</sub></i>                                                                      | 295                            | <a href="https://doi.org/10.1039/d3na00899a">https://doi.org/10.1039/d3na00899a</a>                         | <i>Nanoscale Adv</i> , 2024, <b>6</b> , 867–875                 |

|                              |                                |                                                                                                             |                                                                                    |
|------------------------------|--------------------------------|-------------------------------------------------------------------------------------------------------------|------------------------------------------------------------------------------------|
| $NiCo_{2-x}Mn_xO_4$          | 296                            | <a href="https://doi.org/10.1039/d4ta02978j">https://doi.org/10.1039/d4ta02978j</a>                         | <i>J Mater Chem A Mater</i> , 2024, <b>12</b> , 21956–21970                        |
| $Fe_{0.64}Ni_{0.36}$         | 298                            | <a href="https://doi.org/10.1016/j.cattod.2019.09.046">https://doi.org/10.1016/j.cattod.2019.09.046</a>     | <i>Catal Today</i> , 2020, <b>352</b> , 27–33                                      |
| $SnCo_2O_4/rGO$              | 299                            | <a href="https://doi.org/10.1016/j.ijhydene.2023.06.238">https://doi.org/10.1016/j.ijhydene.2023.06.238</a> | <i>Int J Hydrogen Energy</i> , 2024, <b>51</b> , 436–447                           |
| $RGO-ZnCo_2O_4$              | 300                            | <a href="https://doi.org/10.1016/j.ijhydene.2018.11.163">https://doi.org/10.1016/j.ijhydene.2018.11.163</a> | <i>Int J Hydrogen Energy</i> , 2019, <b>44</b> , 1565–1578                         |
| $MnFeCoNi$                   | 302                            | <a href="https://doi.org/10.1016/j.jpowsour.2019.05.030">https://doi.org/10.1016/j.jpowsour.2019.05.030</a> | <i>J Power Sources</i> , 2019, <b>430</b> , 104–111                                |
| $Cu-Zn-Ag$                   | 303 at 1.0 mA cm <sup>-2</sup> | <a href="https://doi.org/10.1002/er.5989">https://doi.org/10.1002/er.5989</a>                               | <i>Int J Energy Res</i> , 2021, <b>45</b> , 2931–2944                              |
| $Co_3O_4@MWCNT$              | 309                            | <a href="https://doi.org/10.1039/c4ta04641b">https://doi.org/10.1039/c4ta04641b</a>                         | <i>J Mater Chem A Mater</i> , 2015, <b>3</b> , 1761–1768                           |
| $O-Ni-Fe/200-3$              | 318                            | <a href="https://doi.org/10.20517/energymater.2022.19">https://doi.org/10.20517/energymater.2022.19</a>     | <i>Energy Materials</i> , 2022, <b>2</b> , 200019                                  |
| $Co-Fe$                      | 319                            | <a href="https://doi.org/10.1021/jacs.3c08099">https://doi.org/10.1021/jacs.3c08099</a>                     | <i>J Am Chem Soc</i> , 2023, <b>145</b> , 23691–23701                              |
| $Co-COF@MOF$                 | 328                            | <a href="https://doi.org/10.1002/sml.202308598">https://doi.org/10.1002/sml.202308598</a>                   | <i>Small</i> , 2024, <b>20</b> , 2308598, 1–8                                      |
| $NiCo_2O_4$                  | 340                            | <a href="https://doi.org/10.1039/c4dt03803g">https://doi.org/10.1039/c4dt03803g</a>                         | <i>Dalton Transactions</i> , 2015, <b>44</b> , 4148–4154                           |
| $Fe(ox)(H_2O)_2/NF(-1.4)-15$ | 340 at 100 mA cm <sup>-2</sup> | <a href="https://doi.org/10.1021/acs.inorgchem.1c00170">https://doi.org/10.1021/acs.inorgchem.1c00170</a>   | <i>Inorg Chem</i> , 2021, <b>60</b> , 5140–5152                                    |
| $CuO/Ni@400$                 | 364                            | <a href="https://doi.org/10.1016/j.jiec.2019.04.019">https://doi.org/10.1016/j.jiec.2019.04.019</a>         | <i>Journal of Industrial and Engineering Chemistry</i> , 2019, <b>76</b> , 515–523 |
| $MAC$                        | 366                            | <a href="https://doi.org/10.1039/c6ra19333a">https://doi.org/10.1039/c6ra19333a</a>                         | <i>RSC Adv</i> , 2016, <b>6</b> , 102422–102427                                    |
| $NiFe_2O_4/CuWO_4$           | 370                            | <a href="https://doi.org/10.1039/d4cp00473f">https://doi.org/10.1039/d4cp00473f</a>                         | <i>Physical Chemistry Chemical Physics</i> , 2024, <b>26</b> , 14883–14897         |

|                                                                                                                    |                                |                                                                                                               |                                                                                               |
|--------------------------------------------------------------------------------------------------------------------|--------------------------------|---------------------------------------------------------------------------------------------------------------|-----------------------------------------------------------------------------------------------|
| <i>CoMnNiS</i>                                                                                                     | 371                            | <a href="https://doi.org/10.1007/s10854-021-05860-3">https://doi.org/10.1007/s10854-021-05860-3</a>           | <i>Journal of Materials Science: Materials in Electronics</i> , 2021, <b>32</b> , 12292–12307 |
| <i>NiCo-MOF@NiSb@GB</i>                                                                                            | 379 at 100 mA cm <sup>-2</sup> | <a href="https://doi.org/10.1021/acsami.3c03021">https://doi.org/10.1021/acsami.3c03021</a>                   | <i>ACS Appl Mater Interfaces</i> , 2023, <b>15</b> , 34682–34697                              |
| <i>(Ba<sub>0.5</sub>Sr<sub>0.5</sub>)<sub>1-x</sub>Co<sub>0.8</sub>F<sub>e<sub>0.2</sub>O<sub>0.05</sub></sub></i> | 380                            | <a href="https://doi.org/10.1002/cjoc.202100215">https://doi.org/10.1002/cjoc.202100215</a>                   | <i>Chin J Chem</i> , 2021, <b>39</b> , 2692–2698                                              |
| <i>AgNPs@SBA-NH2</i>                                                                                               | 390                            | <a href="https://doi.org/10.1039/c8dt04159h">https://doi.org/10.1039/c8dt04159h</a>                           | <i>Dalton Transactions</i> , 2019, <b>48</b> , 2220–2227                                      |
| <i>Ni<sub>x</sub>Co<sub>1-x</sub>O<sub>y</sub></i>                                                                 | 404                            | <a href="https://doi.org/10.1039/d1ra07304d">https://doi.org/10.1039/d1ra07304d</a>                           | <i>RSC Adv</i> , 2022, <b>12</b> , 1694–1703                                                  |
| <i>AgNW@Cu<sub>2</sub>O</i>                                                                                        | 409                            | <a href="https://doi.org/10.1039/d4na00364k">https://doi.org/10.1039/d4na00364k</a>                           | <i>Nanoscale Adv</i> , 2024, <b>6</b> , 4426–4433                                             |
| <i>Co<sub>3</sub>O<sub>4</sub></i>                                                                                 | 409                            | <a href="https://doi.org/10.1016/j.jallcom.2020.154919">https://doi.org/10.1016/j.jallcom.2020.154919</a>     | <i>J Alloys Compd</i> , 2020, <b>836</b> , 154919                                             |
| <i>S0.95NCF</i>                                                                                                    | 420 at 5 mA cm <sup>-2</sup>   | <a href="https://doi.org/10.1016/j.electacta.2017.10.172">https://doi.org/10.1016/j.electacta.2017.10.172</a> | <i>Electrochim Acta</i> , 2018, <b>259</b> , 1004–1010                                        |
| <i>Ni<sub>0.3</sub>Co<sub>0.7</sub>O</i>                                                                           | 450                            | <a href="https://doi.org/10.1039/d0ra03050c">https://doi.org/10.1039/d0ra03050c</a>                           | <i>RSC Adv</i> , 2020, <b>10</b> , 17845–17853                                                |
| <i>Cu-EA</i>                                                                                                       | 470                            | <a href="https://doi.org/10.1039/c6cc00526h">https://doi.org/10.1039/c6cc00526h</a>                           | <i>Chemical Communications</i> , 2016, <b>52</b> , 5546–5549                                  |
| <i>rGO/CoMoO<sub>4</sub></i>                                                                                       | 475                            | <a href="https://doi.org/10.1002/celc.201900055">https://doi.org/10.1002/celc.201900055</a>                   | <i>ChemElectroChem</i> , 2019, <b>6</b> , 2524–2530                                           |
| <i>NiCo-LDH@FeOOH</i>                                                                                              | 224                            | <a href="https://doi.org/10.1016/j.nanoen.2019.104367">https://doi.org/10.1016/j.nanoen.2019.104367</a>       | <i>Nano Energy</i> , 2020, <b>69</b> , 104367                                                 |
| <i>CWO-NPs</i>                                                                                                     | 570                            | <a href="https://doi.org/10.1002/celc.201801196">https://doi.org/10.1002/celc.201801196</a>                   | <i>ChemElectroChem</i> , 2018, <b>5</b> , 3938–3945                                           |

**Table S3:** Recently reported OER overpotentials measured for the current density of 10 mA cm<sup>-2</sup> (unless otherwise specified) against Hg/Hg<sub>2</sub>Cl<sub>2</sub> reference electrode for various catalysts listed in Figure 2a and Figure 2c (in main text) in 1.0 M KOH since 2019.

| <b>Catalyst</b>                                       | <b><math>\eta^{10} / mV</math></b> | <b>DOI</b>                                                                                                | <b>Bibliography</b>                                                       |
|-------------------------------------------------------|------------------------------------|-----------------------------------------------------------------------------------------------------------|---------------------------------------------------------------------------|
| <i>FF-Na<sub>500</sub>Ni<sub>500</sub></i>            | 150 at 20 mA cm <sup>-2</sup>      | <a href="https://doi.org/10.1002/sml.202000663">https://doi.org/10.1002/sml.202000663</a>                 | <i>Small</i> 2020, <b>16</b> , 2000663                                    |
| <i>Co(OH)<sub>2</sub>@HOS/CP</i>                      | 153 at 100 mA cm <sup>-2</sup>     | <a href="https://doi.org/10.1002/adfm.201909610">https://doi.org/10.1002/adfm.201909610</a>               | <i>Adv Funct Mater</i> , 2020, <b>30</b> , 1909610                        |
| <i>C-Qds-Mn</i>                                       | 166.71                             | <a href="https://doi.org/10.1016/j.jics.2022.100775">https://doi.org/10.1016/j.jics.2022.100775</a>       | <i>Journal of the Indian Chemical Society</i> , 2022, <b>99</b> , 100775. |
| <i>Pd/NiFeO<sub>x</sub></i>                           | 180                                | <a href="https://doi.org/10.1002/adfm.202107181">https://doi.org/10.1002/adfm.202107181</a>               | <i>Adv Funct Mater</i> , 2021, <b>31</b> , 2107181                        |
| <i>np-NiAl-LDH/NF</i>                                 | 180                                | <a href="https://doi.org/10.1039/d0se00050g">https://doi.org/10.1039/d0se00050g</a>                       | <i>Sustain Energy Fuels</i> , 2020, <b>4</b> , 2850–2858.                 |
| <i>NiFe(OH)<sub>x</sub>/(Ni, Fe)Se<sub>2</sub>/CC</i> | 180                                | <a href="https://doi.org/10.1002/sml.202007334">https://doi.org/10.1002/sml.202007334</a>                 | <i>Small</i> 2021, <b>17</b> , 2007334                                    |
| <i>VOOH-3Fe</i>                                       | 195                                | <a href="https://doi.org/10.1002/sml.201904688">https://doi.org/10.1002/sml.201904688</a>                 | <i>Small</i> 2019, <b>15</b> , 1904688                                    |
| <i><math>\beta</math>-NiFeOOH/NF</i>                  | 196                                | <a href="https://doi.org/10.1039/d2ta04688a">https://doi.org/10.1039/d2ta04688a</a>                       | <i>J Mater Chem A Mater</i> , 2022, <b>10</b> , 20847–20855               |
| <i>HCl-c-NiFe</i>                                     | 197 at 100 mA cm <sup>-2</sup>     | <a href="https://doi.org/10.1039/d0nr05458e">https://doi.org/10.1039/d0nr05458e</a>                       | <i>Nanoscale</i> , 2020, <b>12</b> , 21743–21749.                         |
| <i>Fe-CoP/Ni(OH)<sub>2</sub></i>                      | 206                                | <a href="https://doi.org/10.1002/adfm.202101578">https://doi.org/10.1002/adfm.202101578</a>               | <i>Adv Funct Mater</i> , 2021, <b>31</b> , 2101578                        |
| <i>NiFeCoS<sub>x</sub>/FeNi<sub>3</sub></i>           | 210                                | <a href="https://doi.org/10.1039/d1ta07504g">https://doi.org/10.1039/d1ta07504g</a>                       | <i>J Mater Chem A Mater</i> , 2022, <b>10</b> , 5442–5451.                |
| <i>SSF@NiFe-120</i>                                   | 210                                | <a href="https://doi.org/10.1021/acssuschemeng.0c03017">https://doi.org/10.1021/acssuschemeng.0c03017</a> | <i>ACS Sustain Chem Eng</i> , 2020, <b>8</b> , 9885–9895.                 |
| <i>FeNi (Oxy) Hydroxide</i>                           | 215                                | <a href="https://doi.org/10.1002/cctc.201900718">https://doi.org/10.1002/cctc.201900718</a>               | <i>ChemCatChem</i> , 2019, <b>11</b> , 3004–3009.                         |
| <i>Cu<sub>0.50</sub>Fe<sub>0.50</sub>/NF</i>          | 218                                | <a href="https://doi.org/10.1002/sml.201905884">https://doi.org/10.1002/sml.201905884</a>                 | <i>Small</i> , 2020, <b>16</b> , 1905884                                  |
| <i>Fe -NiFe(OH)</i>                                   | 220                                | <a href="https://doi.org/10.1039/d1ta10103j">https://doi.org/10.1039/d1ta10103j</a>                       | <i>J Mater Chem A Mater</i> , 2022, <b>10</b> , 8989–9000.                |
| <i>NiFe/NiFe-OH</i>                                   | 222                                | <a href="https://doi.org/10.1016/j.apcatb.2020.119326">https://doi.org/10.1016/j.apcatb.2020.119326</a>   | <i>Wang, Appl</i>                                                         |

|                                                                                          |                                |                                                                                                               |                                                                                                                                |
|------------------------------------------------------------------------------------------|--------------------------------|---------------------------------------------------------------------------------------------------------------|--------------------------------------------------------------------------------------------------------------------------------|
| <i>RuCu NSs/C-350</i><br>°C                                                              | 234                            | <a href="https://doi.org/10.1002/anie.201908092">https://doi.org/10.1002/anie.201908092</a>                   | <i>Catal B</i> , 2020, <b>278</b> , 119326.<br><i>Angewandte Chemie International Edition</i> , 2019, <b>58</b> , 13983–13988. |
| <i>Co<sub>0.75</sub>Ni<sub>0.25</sub>(OH)<sub>2</sub></i>                                | 235                            | <a href="https://doi.org/10.1002/sml.201804832">https://doi.org/10.1002/sml.201804832</a>                     | <i>Small</i> 2019, <b>15</b> , 1804832                                                                                         |
| <i>Mn-FeP/Co<sub>3</sub>(PO<sub>4</sub>)<sub>2</sub></i>                                 | 237                            | <a href="https://doi.org/10.1002/cssc.201802437">https://doi.org/10.1002/cssc.201802437</a>                   | <i>ChemSusChem</i> , 2019, <b>12</b> , 1334–1341.                                                                              |
| <i>Ni<sub>2</sub>P<sub>2</sub>O<sub>7</sub>·8H<sub>2</sub>O/SS</i>                       | 239                            | <a href="https://doi.org/10.1016/j.jallcom.2018.11.213">https://doi.org/10.1016/j.jallcom.2018.11.213</a>     | <i>J Alloys Compd</i> , 2019, <b>779</b> , 49–58.                                                                              |
| <i>Ru<sub>x</sub>Cr<sub>1-x</sub>O<sub>y</sub>_20</i>                                    | 240                            | <a href="https://doi.org/10.1039/d3ta05897b">https://doi.org/10.1039/d3ta05897b</a>                           | <i>J Mater Chem A Mater</i> , 2023, <b>11</b> , 26626–26635.                                                                   |
| <i>Ag/NCMO/NF</i>                                                                        | 243                            | <a href="https://doi.org/10.1002/adfm.202107056">https://doi.org/10.1002/adfm.202107056</a>                   | <i>Adv Funct Mater</i> , 2022, <b>32</b> , 2107056                                                                             |
| <i>FeOOH/Ni(OH)<sub>2</sub></i>                                                          | 245 at 50 mA cm <sup>-2</sup>  | <a href="https://doi.org/10.1039/c9nr08297b">https://doi.org/10.1039/c9nr08297b</a>                           | <i>Nanoscale</i> , 2020, <b>12</b> , 983–990.                                                                                  |
| <i>Ir-Te NWS</i>                                                                         | 248                            | <a href="https://doi.org/10.1007/s12274-021-3603-9">https://doi.org/10.1007/s12274-021-3603-9</a>             | <i>Nano Res</i> , 2022, <b>15</b> , 1087–1093.                                                                                 |
| <i>Ru/IrO<sub>x</sub> NPs</i>                                                            | 250 at 3 mA cm <sup>-2</sup>   | <a href="https://doi.org/10.1016/j.electacta.2020.136058">https://doi.org/10.1016/j.electacta.2020.136058</a> | <i>Electrochim Acta</i> , 2020, <b>341</b> , 136058.                                                                           |
| <i>Mn<sub>1-x</sub>Ni<sub>x</sub>Co<sub>2</sub>O<sub>4</sub>/rGO</i><br>( <i>x</i> =0.6) | 250                            | <a href="https://doi.org/10.1016/j.ijhydene.2019.12.164">https://doi.org/10.1016/j.ijhydene.2019.12.164</a>   | <i>Int J Hydrogen Energy</i> , 2020, <b>45</b> , 6391–6403.                                                                    |
| <i>FeCoNiOOH</i>                                                                         | 252 at mA cm <sup>-2</sup>     | <a href="https://doi.org/10.1016/j.jmst.2021.08.083">https://doi.org/10.1016/j.jmst.2021.08.083</a>           | <i>J Mater Sci Technol</i> , 2022, <b>110</b> , 128–135.                                                                       |
| <i>WCoP/CC</i>                                                                           | 252                            | <a href="https://doi.org/10.1002/celec.201901417">https://doi.org/10.1002/celec.201901417</a>                 | <i>ChemElectroChem</i> , 2019, <b>6</b> , 5229–5236.                                                                           |
| <i>S-FeOOH<sub>+1000</sub>/IF</i>                                                        | 254 at 100 mA cm <sup>-2</sup> | <a href="https://doi.org/10.1016/j.apcatb.2022.121571">https://doi.org/10.1016/j.apcatb.2022.121571</a>       | <i>Appl Catal B</i> , 2022, <b>315</b> , 121571.                                                                               |
| <i>Ni/NiFeMoO<sub>x</sub>/NF</i>                                                         | 255                            | <a href="https://doi.org/10.1002/advs.201902034">https://doi.org/10.1002/advs.201902034</a>                   | <i>Advanced Science</i> , 2020, <b>7</b> , 1902034                                                                             |
| <i>NiFeCMo-30</i>                                                                        | 256                            | <a href="https://doi.org/10.1016/j.ijhydene.2018.11.168">https://doi.org/10.1016/j.ijhydene.2018.11.168</a>   | <i>Int J Hydrogen Energy</i> , 2019, <b>44</b> , 1336–1344.                                                                    |
| <i>NiFe-LDH pyramid</i>                                                                  | 258                            | <a href="https://doi.org/10.1038/s41598-021-04347-9">https://doi.org/10.1038/s41598-021-04347-9</a>           | <i>Sci Rep</i> , 2022, <b>12</b> , 346.                                                                                        |



|                                                            |                                |                                                                                                             |                                                        |
|------------------------------------------------------------|--------------------------------|-------------------------------------------------------------------------------------------------------------|--------------------------------------------------------|
| <i>FeCoNiS / NF</i>                                        | 260 at mA cm <sup>-2</sup>     | <a href="https://doi.org/10.1002/cssc.202200590">https://doi.org/10.1002/cssc.202200590</a>                 | <i>ChemSusChem</i> , 2022, 15, e202200590.             |
| <i>Ni/Fe<sup>3+</sup> foam</i>                             | 262                            | <a href="https://doi.org/10.1039/d0ta02858d">https://doi.org/10.1039/d0ta02858d</a>                         | <i>J Mater Chem A Mater</i> , 2020, 8, 12603–12612.    |
| <i>CoCr<sub>0.7</sub>Rh<sub>1.3</sub>O<sub>4</sub></i>     | 263                            | <a href="https://doi.org/10.1002/adfm.202301559">https://doi.org/10.1002/adfm.202301559</a>                 | <i>Adv Funct Mater</i> , 2023, 33, 2301559             |
| <i>CC/Co(OH)<sub>2</sub>/CoSe</i>                          | 268 at 20 mA cm <sup>-2</sup>  | <a href="https://doi.org/10.1039/c9na00725c">https://doi.org/10.1039/c9na00725c</a>                         | <i>Nanoscale Adv</i> , 2020, 2, 792–797.               |
| <i>S–Ni-800</i>                                            | 268                            | <a href="https://doi.org/10.1039/d2qi00226d">https://doi.org/10.1039/d2qi00226d</a>                         | <i>Inorg Chem Front</i> , 2022, 9, 1973–1983.          |
| <i>Ru<sub>0.5</sub>Ir<sub>0.5</sub>O<sub>2</sub> NPs</i>   | 270                            | <a href="https://doi.org/10.1016/j.ijhydene.2019.10.179">https://doi.org/10.1016/j.ijhydene.2019.10.179</a> | <i>Int J Hydrogen Energy</i> , 2020, 45, 46–55.        |
| <i>Cu<sub>2</sub>S nanorods</i>                            | 270                            | <a href="https://doi.org/10.1039/d0nj00909a">https://doi.org/10.1039/d0nj00909a</a>                         | <i>New Journal of Chemistry</i> , 2020, 44, 8771–8777. |
| <i>NiCo-LDH</i>                                            | 270 at 20 mA cm <sup>-2</sup>  | <a href="https://doi.org/10.1039/d0se00899k">https://doi.org/10.1039/d0se00899k</a>                         | <i>Sustain Energy Fuels</i> , 2020, 4, 5254–5263.      |
| <i>(Fe-Ni)Co<sub>x</sub>-OH</i>                            | 280                            | <a href="https://doi.org/10.1016/j.apcatb.2019.118338">https://doi.org/10.1016/j.apcatb.2019.118338</a>     | <i>Appl Catal B</i> , 2020, 263, 118338.               |
| <i>Ni<sub>0.34</sub>Co<sub>0.46</sub>Ir<sub>0.2</sub>O</i> | 280                            | <a href="https://doi.org/10.1016/j.apcatb.2018.10.041">https://doi.org/10.1016/j.apcatb.2018.10.041</a>     | <i>Appl Catal B</i> , 2019, 244, 295–302.              |
| <i>FeP–CoP/NC/CC</i>                                       | 281                            | <a href="https://doi.org/10.1038/s41467-021-24284-5">https://doi.org/10.1038/s41467-021-24284-5</a>         | <i>Nat Commun</i> , 2021, 12, 4143.                    |
| <i>Co/CoTe<sub>2</sub>-240</i>                             | 286                            | <a href="https://doi.org/10.1039/d0qi00372g">https://doi.org/10.1039/d0qi00372g</a>                         | <i>Inorg Chem Front</i> , 2020, 7, 2523–2532.          |
| <i>CuCo<sub>2</sub>O<sub>4</sub>/CC</i>                    | 288                            | <a href="https://doi.org/10.1016/j.jcis.2020.04.100">https://doi.org/10.1016/j.jcis.2020.04.100</a>         | <i>J Colloid Interface Sci</i> , 2020, 576, 476–485.   |
| <i>(Ni-Fe)S<sub>x</sub>/NiFe(OH)<sub>y</sub></i>           | 290 at 100 mA cm <sup>-2</sup> | <a href="https://doi.org/10.1016/j.apcatb.2019.01.082">https://doi.org/10.1016/j.apcatb.2019.01.082</a>     | <i>Appl Catal B</i> , 2019, 246, 337–348.              |
| <i>Re/ ReS<sub>2</sub>-7H/CC</i>                           | 290                            | <a href="https://doi.org/10.1002/sml.202003007">https://doi.org/10.1002/sml.202003007</a>                   | <i>Small</i> 2020, 16, 2003007                         |
| <i>FeCoNiMnOOH</i>                                         | 291 at 100 mA cm <sup>-2</sup> | <a href="https://doi.org/10.1016/j.jclepro.2022.131680">https://doi.org/10.1016/j.jclepro.2022.131680</a>   | <i>J Clean Prod</i> , 2022, 356, 131680.               |
| <i>Ni<sub>0.26</sub>Co<sub>0.74</sub>Se/NF</i>             | 291 at 50 mA cm <sup>-2</sup>  | <a href="https://doi.org/10.1016/j.jpccs.2020.109658">https://doi.org/10.1016/j.jpccs.2020.109658</a>       | <i>Journal of Physics and Chemistry of</i>             |

|                                         |                                |                                                                                                               |                                                                               |
|-----------------------------------------|--------------------------------|---------------------------------------------------------------------------------------------------------------|-------------------------------------------------------------------------------|
|                                         |                                |                                                                                                               | <i>Solids</i> , 2021,<br><b>148</b> , 109658.                                 |
| <i>Co-Fe-O-B-10</i>                     | 294                            | <a href="https://dx.doi.org/10.1021/acsaem.0c01040">https://dx.doi.org/10.1021/acsaem.0c01040</a>             | <i>ACS Appl Energy Mater.</i> , 2020, <b>3</b> , 7619–7628.                   |
| <i>CoWO<sub>4-x</sub>/C</i>             | 295                            | <a href="https://doi.org/10.1016/j.apcatb.2019.118090">https://doi.org/10.1016/j.apcatb.2019.118090</a>       | <i>Appl Catal B</i> , 2019, <b>259</b> , 118090.                              |
| <i>Fe-Co-S/Cu<sub>2</sub>O/Cu</i>       | 297 at 20 mA cm <sup>-2</sup>  | <a href="https://doi.org/10.1016/j.apsusc.2021.150757">https://doi.org/10.1016/j.apsusc.2021.150757</a>       | <i>Appl Surf Sci</i> , 2021, <b>567</b> , 150757.                             |
| <i>DO-IrTe<sub>2</sub> HNSs</i>         | 298                            | <a href="https://doi.org/10.1002/adfm.202004375">https://doi.org/10.1002/adfm.202004375</a>                   | <i>Adv Funct Mater.</i> , 2020, <b>30</b> , 2004375                           |
| <i>Cl-doped α-Co(OH)<sub>2</sub></i>    | 298                            | <a href="https://doi.org/10.1039/c9dt02141h">https://doi.org/10.1039/c9dt02141h</a>                           | <i>Dalton Transactions</i> , 2019, <b>48</b> , 12127–12136.                   |
| <i>NiSe/NF</i>                          | 306 at 100 mA cm <sup>-2</sup> | <a href="https://doi.org/10.1016/j.electacta.2019.135549">https://doi.org/10.1016/j.electacta.2019.135549</a> | <i>Electrochim Acta</i> , 2020, <b>334</b> , 135549.                          |
| <i>CoO/NF</i>                           | 307                            | <a href="https://doi.org/10.1016/j.ijhydene.2020.01.085">https://doi.org/10.1016/j.ijhydene.2020.01.085</a>   | <i>Int J Hydrogen Energy</i> , 2020, <b>45</b> , 8031–8040.                   |
| <i>NiDHBT films</i>                     | 310 at 250 mA cm <sup>-2</sup> | <a href="http://dx.doi.org/10.1021/acsaem.9b00860">http://dx.doi.org/10.1021/acsaem.9b00860</a>               | <i>ACS Appl Energy Mater.</i> , 2019, <b>2</b> , 5734–5743.                   |
| <i>MnFe<sub>2</sub>O<sub>4</sub>/NF</i> | 310                            | <a href="https://doi.org/10.1016/j.apsusc.2021.149124">https://doi.org/10.1016/j.apsusc.2021.149124</a>       | <i>Appl Surf Sci</i> , 2021, <b>546</b> , 149124.                             |
| <i>CoCO<sub>3</sub> PNSs</i>            | 310                            | <a href="https://doi.org/10.1016/j.cej.2020.128066">https://doi.org/10.1016/j.cej.2020.128066</a>             | <i>Chemical Engineering Journal</i> , 2021, <b>417</b> , 128066.              |
| <i>NrN@Ni</i>                           | 313                            | <a href="https://doi.org/10.1007/s10008-019-04299-1">https://doi.org/10.1007/s10008-019-04299-1</a>           | <i>Journal of Solid State Electrochemistry</i> , 2019, <b>23</b> , 2051–2060. |
| <i>NiO-D2</i>                           | 314                            | <a href="https://doi.org/10.1039/d2se00829g">https://doi.org/10.1039/d2se00829g</a>                           | <i>Sustain Energy Fuels</i> , 2022, <b>6</b> , 4498–4505.                     |
| <i>Co<sub>3</sub>Mo<sub>3</sub>C/N</i>  | 316                            | <a href="https://doi.org/10.1016/j.ijhydene.2021.04.084">https://doi.org/10.1016/j.ijhydene.2021.04.084</a>   | <i>Int J Hydrogen Energy</i> , 2021, <b>46</b> , 22268–22276.                 |
| <i>Ru/RuO<sub>2</sub>-200</i>           | 320                            | <a href="https://doi.org/10.1002/eem2.12031">https://doi.org/10.1002/eem2.12031</a>                           | <i>Energy &amp; Environ. Mater.</i> , 2019, <b>2</b> , 201–                   |

|                                                        |                                |                                                                                                                 |                                                               |
|--------------------------------------------------------|--------------------------------|-----------------------------------------------------------------------------------------------------------------|---------------------------------------------------------------|
|                                                        |                                |                                                                                                                 | 208.                                                          |
| <i>HP Ni-P</i>                                         | 323 at 100 mA cm <sup>-2</sup> | <a href="https://doi.org/10.1039/d0ta03739g">https://doi.org/10.1039/d0ta03739g</a>                             | <i>J Mater Chem A Mater</i> , 2020, <b>8</b> , 12069–12079.   |
| <i>a c-FeOOH</i>                                       | 330 at 300 mA cm <sup>-2</sup> | <a href="https://doi.org/10.1002/cssc.202001229">https://doi.org/10.1002/cssc.202001229</a>                     | <i>ChemSusChem</i> , 2020, <b>13</b> , 4911–4915.             |
| <i>NiCoFe-rGO</i>                                      | 332                            | <a href="https://doi.org/10.1016/j.jcat.2019.08.006">https://doi.org/10.1016/j.jcat.2019.08.006</a>             | <i>J Catal</i> , 2019, <b>377</b> , 619–628.                  |
| <i>Rh(nP)/nC</i>                                       | 333 at 5 mA cm <sup>-2</sup>   | <a href="https://doi.org/10.1039/d0nr05659f">https://doi.org/10.1039/d0nr05659f</a>                             | <i>Nanoscale</i> , 2020, <b>12</b> , 20165–20170.             |
| <i>NiFe<sub>2</sub>O<sub>4</sub>/CC</i>                | 340                            | <a href="https://doi.org/10.1016/j.electacta.2019.134883">https://doi.org/10.1016/j.electacta.2019.134883</a>   | <i>Electrochim Acta</i> , 2019, <b>324</b> , 134883.          |
| <i>NiO_200 nm</i>                                      | 345                            | <a href="https://doi.org/10.1039/D0MA00467G">https://doi.org/10.1039/D0MA00467G</a>                             | <i>Mater Adv</i> , 2020, <b>1</b> , 1971–1979.                |
| <i>CC/NCL-75</i>                                       | 350                            | <a href="https://doi.org/10.1016/j.jpowsour.2021.229468">https://doi.org/10.1016/j.jpowsour.2021.229468</a>     | <i>J Power Sources</i> , 2021, <b>488</b> , 229468.           |
| <i>FeCoNi-ATNs (H)/NF</i>                              | 350 at 400 mA cm <sup>-2</sup> | <a href="https://doi.org/10.1002/aenm.201901312">https://doi.org/10.1002/aenm.201901312</a>                     | <i>Adv Energy Mater</i> , 2019, <b>9</b> , 1901312            |
| <i>NiCu@NiCuOOH-NF</i>                                 | 366                            | <a href="https://doi.org/10.1016/j.ijhydene.2022.03.139">https://doi.org/10.1016/j.ijhydene.2022.03.139</a>     | <i>Int J Hydrogen Energy</i> , 2022, <b>47</b> , 16080–16091. |
| <i>FeNi (1:1) porous Co-P</i>                          | 370 at 5 mA cm <sup>-2</sup>   | <a href="https://doi.org/10.1002/celc.201900483">https://doi.org/10.1002/celc.201900483</a>                     | <i>ChemElectroChem</i> , 2019, <b>6</b> , 3478–3487.          |
|                                                        | 380                            | <a href="https://dx.doi.org/10.1021/acssuschemeng.0c02671">https://dx.doi.org/10.1021/acssuschemeng.0c02671</a> | <i>ACS Sustain Chem Eng</i> , 2020, <b>8</b> , 10193–10200.   |
| <i>FeCoNiB@B-VG</i>                                    | 387                            | <a href="https://doi.org/10.1016/j.electacta.2021.138459">https://doi.org/10.1016/j.electacta.2021.138459</a>   | <i>Electrochim Acta</i> , 2021, <b>386</b> , 138459.          |
| <i>Ba<sub>0.5</sub>Sr<sub>0.5</sub>CoO<sub>3</sub></i> | 395                            | <a href="https://doi.org/10.1021/acs.energyfuels.2c00357">https://doi.org/10.1021/acs.energyfuels.2c00357</a>   | <i>Energy &amp; Fuels</i> , 2022, <b>36</b> , 3219–3228.      |
| <i>Co Coating</i>                                      | 438                            | <a href="https://doi.org/10.3390/ma14010092">https://doi.org/10.3390/ma14010092</a>                             | <i>Materials</i> , 2020, <b>14</b> , 92.                      |
| <i>Li-bir/rGO</i>                                      | 490                            | <a href="http://dx.doi.org/10.1149/2.0901908jes">http://dx.doi.org/10.1149/2.0901908jes</a>                     | <i>Soc</i> , 2019, <b>166</b> , A1543–A1549.                  |
| <i>Gr/AME-Ni Fe10%</i>                                 | 519                            | <a href="https://doi.org/10.1002/celc.201901541">https://doi.org/10.1002/celc.201901541</a>                     | <i>ChemElectroChem</i> , 2019, <b>6</b> , 5633–5641.          |

**Table S4:** Recently reported OER overpotentials measured for the current density of 10 mA cm<sup>-2</sup> (unless otherwise specified) against Hg/HgO reference electrode for various catalysts listed in Figure 2a and Figure 2d (in main text) in 1.0 M KOH since 2019.

| <i>Catalyst</i>        | $\eta^{10} / mV$              | <i>DOI</i>                                                                                                  | <i>Bibliography</i>                                                             |
|------------------------|-------------------------------|-------------------------------------------------------------------------------------------------------------|---------------------------------------------------------------------------------|
| $NiS_x/C_3N_4$         | 32                            | <a href="https://doi.org/10.1039/D1EE00509J">https://doi.org/10.1039/D1EE00509J</a>                         | <i>Energy Environ Sci</i> , 2021, <b>14</b> , 5358–5365                         |
| $NiFe-LDH/RGO/NF$      | 150                           | <a href="https://doi.org/10.1016/j.ijhydene.2018.11.167">https://doi.org/10.1016/j.ijhydene.2018.11.167</a> | <i>Int J Hydrogen Energy</i> , 2019, <b>44</b> , 2656–2663.                     |
| $Co(OH)_2@HOS/CP$      | 155                           | <a href="https://doi.org/10.1002/adfm.201909610">https://doi.org/10.1002/adfm.201909610</a>                 | <i>Adv Funct Mater</i> , 2020, <b>30</b> ,1909610                               |
| $Ni_xFe_{3-x}O_4-EDTA$ | 180                           | <a href="https://doi.org/10.1016/j.jcis.2022.11.054">https://doi.org/10.1016/j.jcis.2022.11.054</a>         | <i>J Colloid Interface Sci</i> , 2023, <b>632</b> , 44–53.                      |
| $Fe-K_2WO_4$           | 181                           | <a href="https://doi.org/10.1016/j.apcatb.2024.124423">https://doi.org/10.1016/j.apcatb.2024.124423</a>     | <i>Applied Catalysis B: Environment and Energy</i> , 2024, <b>358</b> , 124423. |
| $CF-FeSO$              | 192                           | <a href="https://doi.org/10.1038/s41467-022-28260-5">https://doi.org/10.1038/s41467-022-28260-5</a>         | <i>Nat Commun</i> , 2022, <b>13</b> , 605.                                      |
| $np-NiFeCoMnOOH$       | 194                           | <a href="https://doi.org/10.1016/j.apcatb.2023.123331">https://doi.org/10.1016/j.apcatb.2023.123331</a>     | <i>Appl Catal B</i> , 2024, <b>341</b> , 123331.                                |
| $Ni-Fe-S@GIP$          | 197                           | <a href="https://doi.org/10.1002/cssc.202100891">https://doi.org/10.1002/cssc.202100891</a>                 | <i>ChemSusChem</i> , 2021, <b>14</b> , 3131–3138.                               |
| $(Ni,Fe)O_xH_y/Ni/Cu$  | 199                           | <a href="https://doi.org/10.1039/C9CY02328C">https://doi.org/10.1039/C9CY02328C</a>                         | <i>Catal Sci Technol</i> , 2020, <b>10</b> , 1803–1808.                         |
| $FeCoNiWCuOOH@Cu$      | 200                           | <a href="https://doi.org/10.1002/advs.202406008">https://doi.org/10.1002/advs.202406008</a>                 | <i>Adv. Sci.</i> 2024, <b>11</b> , 2406008                                      |
| $Co_3O_4-C/FeMoP/NF$   | 200 at 20 mA cm <sup>-2</sup> | <a href="https://doi.org/10.1016/j.ijhydene.2021.07.103">https://doi.org/10.1016/j.ijhydene.2021.07.103</a> | <i>Int J Hydrogen Energy</i> , 2021, <b>46</b> , 32846–                         |

|                                                                               |                               |                                                                                                                                 |                                                                  |
|-------------------------------------------------------------------------------|-------------------------------|---------------------------------------------------------------------------------------------------------------------------------|------------------------------------------------------------------|
|                                                                               |                               |                                                                                                                                 | 32857.                                                           |
| <i>NiCoP/NF</i>                                                               | 203                           | <a href="https://doi.org/10.1016/j.ceramint.2022.09.035">https://doi.org/10.1016/j.ceramint.2022.09.035</a>                     | <i>Ceram Int</i> , 2023, <b>49</b> , 659–668.                    |
| <i>NiFe<sub>A-S</sub>/NF</i>                                                  | 205                           | <a href="https://doi.org/10.1016/j.apcatb.2022.122165">https://doi.org/10.1016/j.apcatb.2022.122165</a>                         | <i>Appl Catal B</i> , 2023, <b>323</b> , 122165.                 |
| <i>CCF-I</i>                                                                  | 210                           | <a href="https://doi.org/10.1016/j.cej.2020.126513">https://doi.org/10.1016/j.cej.2020.126513</a>                               | <i>Chemical Engineering Journal</i> , 2021, <b>404</b> , 126513. |
| <i>NSC@NiFe</i>                                                               | 214                           | <a href="https://doi.org/10.1016/j.carbon.2020.06.022">https://doi.org/10.1016/j.carbon.2020.06.022</a>                         | <i>Carbon N Y</i> , 2020, <b>167</b> , 548–558.                  |
| <i>NiCo<sub>2</sub>O<sub>4</sub> (MNCO)</i>                                   | 218                           | <a href="https://doi.org/10.1016/j.jallcom.2024.175375">https://doi.org/10.1016/j.jallcom.2024.175375</a>                       | <i>J Alloys Compd</i> , 2024, <b>1002</b> , 175375.              |
| <i>Fe<sub>0.5</sub>Ni<sub>0.5</sub>/40% C</i>                                 | 219                           | <a href="https://doi.org/10.1002/sml.202203340">https://doi.org/10.1002/sml.202203340</a>                                       | <i>Small</i> , 2020, <b>18</b> , 2203340                         |
| <i>Fe–Ni<sub>3</sub>S<sub>2</sub>/2OX</i>                                     | 220                           | <a href="https://doi.org/10.1021/acssuschemeng.2c02456">https://doi.org/10.1021/acssuschemeng.2c02456</a>                       | <i>ACS Sustain Chem Eng</i> , 2022, <b>10</b> , 14396–14406.     |
| <i>FeCoNiO<sub>x</sub>/C/NF</i>                                               | 221                           | <a href="https://doi.org/10.1016/j.apcatb.2023.122717">https://doi.org/10.1016/j.apcatb.2023.122717</a>                         | <i>Appl Catal B</i> , 2023, <b>332</b> , 122717.                 |
| <i>CoPx/FeOOH</i>                                                             | 222                           | <a href="https://doi.org/10.1016/j.apcatb.2020.119326">https://doi.org/10.1016/j.apcatb.2020.119326</a>                         | <i>Applied Catalysis B: Environmental</i> 294 (2021) 120256      |
| <i>Graphene quantum dots (GQDs)</i>                                           | 223 at 50 mA cm <sup>-2</sup> | <a href="https://doi.org/10.1016/j.cej.2024.151436">https://doi.org/10.1016/j.cej.2024.151436</a>                               | <i>Chemical Engineering Journal</i> , 2024, <b>489</b> , 151436. |
| <i>Co<sub>6</sub>Mo<sub>6</sub>C/MoC/Co</i>                                   | 223                           | <a href="https://doi.org/10.1016/j.apcatb.2023.122474">https://doi.org/10.1016/j.apcatb.2023.122474</a>                         | <i>Appl Catal B</i> , 2023, <b>328</b> , 122474.                 |
| <i>Co<sub>9</sub>Se<sub>8</sub>/Co<sub>9</sub>S<sub>8</sub>/CoO (Co-S-Se)</i> | 226                           | <a href="https://doi.org/10.1038/s41427-022-00398-0">https://doi.org/10.1038/s41427-022-00398-0</a>                             | <i>NPG Asia Mater</i> , 2022, <b>14</b> , 55.                    |
| <i>FeOx@hcp Ni</i>                                                            | 226                           | <a href="https://doi.org/10.1016/j.apcatb.2020.119687">https://doi.org/10.1016/j.apcatb.2020.119687</a>                         | <i>Appl Catal B</i> , 2021, <b>284</b> , 119687.                 |
| <i>FeCoNiP/CF</i>                                                             | 228                           | <a href="https://doi.org/10.1016/j.solidstatesciences.2023.107205">https://doi.org/10.1016/j.solidstatesciences.2023.107205</a> | <i>Solid State Sciences</i> 141                                  |

|                                         |                                |                                                                                                               |                                                                  |
|-----------------------------------------|--------------------------------|---------------------------------------------------------------------------------------------------------------|------------------------------------------------------------------|
|                                         |                                |                                                                                                               | (2023) 107205                                                    |
| <i>Br-SSM</i>                           | 228                            | <a href="https://doi.org/10.1016/j.jcis.2024.07.043">https://doi.org/10.1016/j.jcis.2024.07.043</a>           | <i>Colloid Interface Sci</i> , 2024, <b>675</b> , 1011–1020.     |
| <i>Ni/NiO@CoFe</i>                      | 230                            | <a href="https://doi.org/10.1002/cssc.201900479">https://doi.org/10.1002/cssc.201900479</a>                   | <i>ChemSusChem</i> 2019, 12, 2773 – 2779                         |
| <i>Co(OH)<sub>2</sub></i>               | 230                            | <a href="https://doi.org/10.1016/j.electacta.2022.140071">https://doi.org/10.1016/j.electacta.2022.140071</a> | <i>Electrochim Acta</i> , 2022, <b>411</b> , 140071.             |
| <i>AB@NiFeSx</i>                        | 232.2                          | <a href="https://doi.org/10.1007/s12274-021-3800-6">https://doi.org/10.1007/s12274-021-3800-6</a>             | <i>Nano Res</i> , 2022, <b>15</b> , 1901–1908.                   |
| <i>NFO-S5</i>                           | 232 at 100 mA cm <sup>-2</sup> | <a href="https://doi.org/10.1016/j.apcatb.2021.121030">https://doi.org/10.1016/j.apcatb.2021.121030</a>       | <i>Appl Catal B</i> , 2022, <b>305</b> , 121030.                 |
| <i>FeCoNi AG</i>                        | 235                            | <a href="https://doi.org/10.1016/j.cej.2021.132955">https://doi.org/10.1016/j.cej.2021.132955</a>             | <i>Chemical Engineering Journal</i> , 2022, <b>430</b> , 132955. |
| <i>Ag/NCMO/NF</i>                       | 243                            | <a href="https://doi.org/10.1002/adfm.202107056">https://doi.org/10.1002/adfm.202107056</a>                   | <i>Adv Funct Mater</i> , 2021, <b>32</b> , 2107056               |
| <i>Cobalt oxyhydroxide(CoOOH)</i>       | 245                            | <a href="https://doi.org/10.1016/j.electacta.2019.02.083">https://doi.org/10.1016/j.electacta.2019.02.083</a> | <i>Electrochim Acta</i> , 2019, <b>303</b> , 231–238.            |
| <i>NiFeOOH/NFF</i>                      | 245 at 100 mA cm <sup>-2</sup> | <a href="https://doi.org/10.1016/j.ijhydene.2023.11.221">https://doi.org/10.1016/j.ijhydene.2023.11.221</a>   | <i>Int J Hydrogen Energy</i> , 2024, <b>55</b> , 464–473.        |
| <i>Ru-NiFe LDH</i>                      | 246                            | <a href="http://dx.doi.org/10.1149/1945-7111/ac4cda">http://dx.doi.org/10.1149/1945-7111/ac4cda</a>           | <i>J Electrochem Soc</i> , 2022, <b>169</b> , 024503.            |
| <i>Fe@Co-MOFs</i>                       | 248 at 50 mA cm <sup>-2</sup>  | <a href="https://doi.org/10.1039/D2DT01837C">https://doi.org/10.1039/D2DT01837C</a>                           | <i>Dalton Transactions</i> , 2022, <b>51</b> , 15446–15457.      |
| <i>(Fe, Hf)CoOOH/Co(OH)<sub>2</sub></i> | 250                            | <a href="https://doi.org/10.1039/D4QI00823E">https://doi.org/10.1039/D4QI00823E</a>                           | <i>Inorg Chem Front</i> , 2024, <b>11</b> , 5449–5457.           |
| <i>r-BS+G</i>                           | 250                            | <a href="https://doi.org/10.1016/j.cej.2023.144489">https://doi.org/10.1016/j.cej.2023.144489</a>             | <i>Chemical Engineering Journal</i> , 2023, <b>471</b> , 144489. |
| <i>F<sub>3</sub>S<sub>4</sub>/NF</i>    | 251                            | <a href="https://doi.org/10.1021/acs.jpcc.2c051">https://doi.org/10.1021/acs.jpcc.2c051</a>                   | <i>The Journal of</i>                                            |

|                                                                                                   |                                |                                                                                                                 |                                                                  |
|---------------------------------------------------------------------------------------------------|--------------------------------|-----------------------------------------------------------------------------------------------------------------|------------------------------------------------------------------|
|                                                                                                   |                                | 96                                                                                                              | <i>Physical Chemistry C</i> , 2022, <b>126</b> , 16172–16186.    |
| <i>Ir-NFO/NF</i>                                                                                  | 251 at 100 mA cm <sup>-2</sup> | <a href="https://doi.org/10.1002/adfm.202209543">https://doi.org/10.1002/adfm.202209543</a>                     | <i>Adv Funct Mater</i> , 2023, <b>33</b> , 2209543.              |
| <i>(CrFeCoNiMo)<sub>3</sub>O<sub>4</sub></i>                                                      | 255.3                          | <a href="https://doi.org/10.1002/adfm.202309438">https://doi.org/10.1002/adfm.202309438</a>                     | <i>Adv Funct Mater</i> , 2023, <b>34</b> , 2309438               |
| <i>Ag@NiV<sub>0.2</sub>Co<sub>0.2</sub></i>                                                       | 255                            | <a href="https://doi.org/10.1016/j.cej.2021.131662">https://doi.org/10.1016/j.cej.2021.131662</a>               | <i>Chemical Engineering Journal</i> , 2021, <b>425</b> , 131662. |
| <i>NiFe-HD/pre-NF</i>                                                                             | 256 at 100 mA cm <sup>-2</sup> | <a href="https://doi.org/10.1039/D1DT02195H">https://doi.org/10.1039/D1DT02195H</a>                             | <i>Dalton Transactions</i> , 2021, <b>50</b> , 12547–12554.      |
| <i>Pt<sub>3.4</sub>Fe<sub>5</sub>Ni<sub>20</sub>Cu<sub>31</sub>Mo<sub>9</sub>Ru</i><br><i>HEA</i> | 259                            | <a href="https://doi.org/10.1002/sml.202204255">https://doi.org/10.1002/sml.202204255</a>                       | <i>Small</i> , 2022, <b>18</b> , 2204255.                        |
| <i>Zn-NiCoO<sub>x-z</sub>/SSM</i>                                                                 | 260 at 50 mA cm <sup>-2</sup>  | <a href="https://doi.org/10.1016/j.jcis.2023.02.142">https://doi.org/10.1016/j.jcis.2023.02.142</a>             | <i>J Colloid Interface Sci</i> , 2023, <b>640</b> , 737–749.     |
| <i>Ag-Co(OH)<sub>2</sub> on DNA</i>                                                               | 260 at 50 mA cm <sup>-2</sup>  | <a href="https://dx.doi.org/10.1021/acs.inorgchem.0c03569">https://dx.doi.org/10.1021/acs.inorgchem.0c03569</a> | <i>Inorg Chem</i> , 2021, <b>60</b> , 2680–2693.                 |
| <i>FCMOS</i>                                                                                      | 260                            | <a href="https://doi.org/10.1039/D1TA00457C">https://doi.org/10.1039/D1TA00457C</a>                             | <i>J Mater Chem A Mater</i> , 2021, <b>9</b> , 9858–9863.        |
| <i>FeOOH@NiOOH/NF</i>                                                                             | 261 at 20 mA cm <sup>-2</sup>  | <a href="https://doi.org/10.1016/j.jcis.2024.09.219">https://doi.org/10.1016/j.jcis.2024.09.219</a>             | <i>J Colloid Interface Sci</i> , 2025, <b>679</b> , 487–495.     |
| <i>Ni<sub>2</sub>P-Fe<sub>2</sub>P</i>                                                            | 261 at 100 mA cm <sup>-2</sup> | <a href="https://doi.org/10.1002/adfm.202006484">https://doi.org/10.1002/adfm.202006484</a>                     | <i>Adv Funct Mater</i> , 2020, <b>31</b> , 2006484               |
| <i>Ni<sub>3</sub>N/NF</i>                                                                         | 262                            | <a href="https://doi.org/10.1039/D1MA00130B">https://doi.org/10.1039/D1MA00130B</a>                             | <i>Mater Adv</i> , 2021, <b>2</b> , 2299–2309.                   |
| <i>Fe-N-C/Fe NP 300</i>                                                                           | 263                            | <a href="https://doi.org/10.1002/cctc.202400786">https://doi.org/10.1002/cctc.202400786</a>                     | <i>ChemCatChem</i> , 2024, <b>16</b> , e202400786                |
| <i>NiCeWO<sub>x-2</sub></i>                                                                       | 263                            | <a href="https://doi.org/10.1002/celec.202200093">https://doi.org/10.1002/celec.202200093</a>                   | <i>ChemElectroChem</i> , 2022, <b>9</b> , e202200093             |

|                                                            |                                |                                                                                                               |                                                                         |
|------------------------------------------------------------|--------------------------------|---------------------------------------------------------------------------------------------------------------|-------------------------------------------------------------------------|
| <i>NiFeBx</i>                                              | 263 ± 14                       | <a href="https://doi.org/10.1002/adfm.202101820">https://doi.org/10.1002/adfm.202101820</a>                   | <i>Adv Funct Mater</i> , 2021, <b>31</b> , 2101820                      |
| <i>FeCoMo-Se</i>                                           | 264                            | <a href="https://doi.org/10.1039/C9TA14133B">https://doi.org/10.1039/C9TA14133B</a>                           | <i>J Mater Chem A Mater</i> , 2020, <b>8</b> , 7925–7934.               |
| <i>NiFeMn LH</i>                                           | 270 at 50 mA cm <sup>-2</sup>  | <a href="https://doi.org/10.1016/j.cej.2024.154215">https://doi.org/10.1016/j.cej.2024.154215</a>             | <i>Chemical Engineering Journal</i> , 2024, <b>496</b> , 154215.        |
| <i>Co S-NiFe<sub>2</sub>O<sub>4</sub></i>                  | 270 at 500 mA cm <sup>-2</sup> | <a href="https://doi.org/10.1016/j.colsurfa.2022.130682">https://doi.org/10.1016/j.colsurfa.2022.130682</a>   | <i>Colloids Surf A Physicochem Eng Asp</i> , 2023, <b>658</b> , 130682. |
| <i>Fe<sub>1.0</sub>Co<sub>1.1</sub>Ni<sub>1.4</sub>-NC</i> | 270                            | <a href="https://doi.org/10.1039/C9TA13637A">https://doi.org/10.1039/C9TA13637A</a>                           | <i>J Mater Chem A Mater</i> , 2020, <b>8</b> , 9021–9031.               |
| <i>CoFe<sub>2</sub>O<sub>4</sub></i>                       | 275                            | <a href="https://doi.org/10.1039/D0CE00401D">https://doi.org/10.1039/D0CE00401D</a>                           | <i>CrystEngComm</i> , 2020, <b>22</b> , 4317–4323.                      |
| <i>α-Co(OH)<sub>2</sub>/Co<sub>3</sub>O<sub>4</sub>/CC</i> | 275                            | <a href="https://doi.org/10.1039/D1CY00240F">https://doi.org/10.1039/D1CY00240F</a>                           | <i>Catal Sci Technol</i> , 2021, <b>11</b> , 3706–3714.                 |
| <i>LiFeBPO/NF</i>                                          | 276 at 100 mA cm <sup>-2</sup> | <a href="https://doi.org/10.1002/adfm.202303702">https://doi.org/10.1002/adfm.202303702</a>                   | <i>Adv Funct Mater</i> , 2023, <b>33</b> , 2303702                      |
| <i>CoO<sub>x</sub></i>                                     | 280                            | <a href="https://doi.org/10.1021/acs.energyfuels.4c00433">https://doi.org/10.1021/acs.energyfuels.4c00433</a> | <i>Energy &amp; Fuels</i> , 2024, <b>38</b> , 6938–6949.                |
| <i>Co-Fe-S NFs@MS/NF</i>                                   | 281 at 100 mA cm <sup>-2</sup> | <a href="https://doi.org/10.1016/j.electacta.2020.137038">https://doi.org/10.1016/j.electacta.2020.137038</a> | <i>Electrochim Acta</i> , 2020, <b>361</b> , 137038                     |
| <i>Fe-doped NiSe NSs/CNTs</i>                              | 282.7                          | <a href="https://doi.org/10.1039/D1TA07393A">https://doi.org/10.1039/D1TA07393A</a>                           | <i>J Mater Chem A Mater</i> , 2022, <b>10</b> , 3102–3111.              |
| <i>CoPx@FeOOH</i>                                          | 283 at 100 mA cm <sup>-2</sup> | <a href="https://doi.org/10.1016/j.apcatb.2021.120256">https://doi.org/10.1016/j.apcatb.2021.120256</a>       | <i>Appl Catal B</i> , 2021, <b>294</b> , 120256.                        |
| <i>Co(OH)<sub>x</sub>/Ag/Co(OH)<sub>2</sub></i>            | 283                            | <a href="https://doi.org/10.1016/j.jallcom.2021.161674">https://doi.org/10.1016/j.jallcom.2021.161674</a>     | <i>J Alloys Compd</i> , 2021, <b>889</b> , 161674.                      |



|                                                        |                                   |                                                                                                               |                                                                               |
|--------------------------------------------------------|-----------------------------------|---------------------------------------------------------------------------------------------------------------|-------------------------------------------------------------------------------|
| $Fe_{59}Co_{41}$                                       | 285                               | <a href="https://doi.org/10.1016/j.apsusc.2022.153041">https://doi.org/10.1016/j.apsusc.2022.153041</a>       | <i>Appl Surf Sci</i> , 2022, <b>589</b> , 153041                              |
| ZIF-67@CNT                                             | 285                               | <a href="https://doi.org/10.1016/j.electacta.2022.141593">https://doi.org/10.1016/j.electacta.2022.141593</a> | <i>Electrochim Acta</i> , 2023, <b>439</b> , 141593.                          |
| N-Ni <sub>1</sub> Co <sub>4</sub> -S                   | 286.2                             | <a href="https://doi.org/10.1016/j.apsusc.2022.153173">https://doi.org/10.1016/j.apsusc.2022.153173</a>       | <i>Appl Surf Sci</i> , 2022, <b>591</b> , 153173.                             |
| FeVOx/NP                                               | 290 mV at 500 mA cm <sup>-2</sup> | <a href="https://doi.org/10.1021/jacs.3c02288">https://doi.org/10.1021/jacs.3c02288</a>                       | <i>J Am Chem Soc</i> , 2023, <b>145</b> , 12206–12213.                        |
| $PrBa_{0.5}Sr_{0.5}Co_{2-x}Fe_xO_{5+\delta}$ (PBSCF)   | 290                               | <a href="https://doi.org/10.1039/D1TA08445C">https://doi.org/10.1039/D1TA08445C</a>                           | <i>J Mater Chem A Mater</i> , 2022, <b>10</b> , 2271–2279.                    |
| Fe-SAC@COF                                             | 290                               | <a href="https://doi.org/10.1016/j.xpro.2022.101626">https://doi.org/10.1016/j.xpro.2022.101626</a>           | <i>STAR Protoc</i> , 2022, <b>3</b> , 101626.                                 |
| 6MIM-MoCo                                              | 290                               | <a href="https://doi.org/10.1002/cssc.202101666">https://doi.org/10.1002/cssc.202101666</a>                   | <i>ChemSusChem</i> , 2021, <b>15</b> , e202101666                             |
| P-NiO/NiCo <sub>2</sub> O <sub>4</sub>                 | 290                               | <a href="https://doi.org/10.1016/j.jallcom.2022.166338">https://doi.org/10.1016/j.jallcom.2022.166338</a>     | <i>J Alloys Compd</i> , 2022, <b>925</b> , 166338.                            |
| Ni <sub>0.26</sub> Co <sub>0.74</sub> Se/NF            | 291 at 50 mA cm <sup>-2</sup>     | <a href="https://doi.org/10.1016/j.jpccs.2020.109658">https://doi.org/10.1016/j.jpccs.2020.109658</a>         | <i>Journal of Physics and Chemistry of Solids</i> , 2021, <b>148</b> , 109658 |
| NiCo-Bpy-BTC                                           | 292                               | <a href="https://doi.org/10.1016/j.electacta.2022.141714">https://doi.org/10.1016/j.electacta.2022.141714</a> | <i>Electrochim Acta</i> , 2023, <b>439</b> , 141714.                          |
| CoCr <sub>2</sub> O <sub>4</sub>                       | 293                               | <a href="https://doi.org/10.1021/acs.inorgchem.2c03840">https://doi.org/10.1021/acs.inorgchem.2c03840</a>     | <i>Inorg Chem</i> , 2023, <b>62</b> , 2726–2737.                              |
| Co <sub>3-x</sub> Fe <sub>x</sub> O <sub>4</sub> -0.01 | 294                               | <a href="https://doi.org/10.1039/D1DT03936A">https://doi.org/10.1039/D1DT03936A</a>                           | <i>Dalton Transactions</i> , 2022, <b>51</b> , 3137–3145.                     |
| NiCrFeO <sub>4</sub>                                   | 296                               | <a href="https://doi.org/10.1016/j.jiec.2021.06.015">https://doi.org/10.1016/j.jiec.2021.06.015</a>           | <i>Journal of Industrial and Engineering Chemistry</i> , 2021, <b>101</b> ,   |

|                                                                |                                |                                                                                                             |                                                                             |
|----------------------------------------------------------------|--------------------------------|-------------------------------------------------------------------------------------------------------------|-----------------------------------------------------------------------------|
|                                                                |                                |                                                                                                             | 178–185.                                                                    |
| $Ni_2(dtbh-PLY)_2$                                             | 300                            | <a href="https://doi.org/10.1021/acs.inorgchem.4c00078">https://doi.org/10.1021/acs.inorgchem.4c00078</a>   | <i>Inorg Chem</i> , 2024, <b>63</b> , 9771–9785.                            |
| $CoS_x/FeS_x$                                                  | 304                            | <a href="https://dx.doi.org/10.1021/acscatal.9b05170">https://dx.doi.org/10.1021/acscatal.9b05170</a>       | <i>ACS Catal</i> , 2020, <b>10</b> , 1855–1864.                             |
| 5%Ru-CoPO                                                      | 310                            | <a href="https://doi.org/10.1016/j.mtchem.2022.101267">https://doi.org/10.1016/j.mtchem.2022.101267</a>     | <i>Mater Today Chem</i> , 2022, <b>26</b> , 101267.                         |
| NiFeP-Composite                                                | 313                            | <a href="https://doi.org/10.1002/er.8710">https://doi.org/10.1002/er.8710</a>                               | <i>Int J Energy Res</i> , 2022, <b>46</b> , 22078–22088.                    |
| $Ni_{40}Fe_{40}B_{20}$                                         | 319                            | <a href="https://doi.org/10.1016/j.ijhydene.2022.04.200">https://doi.org/10.1016/j.ijhydene.2022.04.200</a> | <i>Int J Hydrogen Energy</i> , 2022, <b>47</b> , 20718–20728.               |
| HfNiSe <sub>2</sub> /rGO                                       | 320 at 20 mA cm <sup>-2</sup>  | <a href="https://doi.org/10.1002/cctc.202300562">https://doi.org/10.1002/cctc.202300562</a>                 | <i>ChemCatChem</i> , 2023, <b>15</b> , e202300562                           |
| $Zn_{0.4}Mn_{0.6}Co_2O_4/rGO$                                  | 320                            | <a href="https://doi.org/10.1016/j.ijhydene.2020.03.231">https://doi.org/10.1016/j.ijhydene.2020.03.231</a> | <i>Int J Hydrogen Energy</i> , 2020, <b>45</b> , 14713–14727.               |
| CoNi-PBA-2                                                     | 326                            | <a href="https://doi.org/10.1021/acsami.1c10441">https://doi.org/10.1021/acsami.1c10441</a>                 | <i>ACS Appl Mater Interfaces</i> , 2021, <b>13</b> , 42715–42723.           |
| Ir-SAs, IrI/Ni <sub>1.6</sub> Mn <sub>1.4</sub> O <sub>4</sub> | 330 at 100 mA cm <sup>-2</sup> | <a href="https://doi.org/10.1002/advs.202200529">https://doi.org/10.1002/advs.202200529</a>                 | <i>Advanced Science</i> , 2022, <b>9</b> , 2200529                          |
| Co <sub>3</sub> O <sub>4</sub> @KNbO <sub>3</sub>              | 330                            | <a href="https://doi.org/10.1016/j.matlet.2023.135178">https://doi.org/10.1016/j.matlet.2023.135178</a>     | <i>Mater Lett</i> , 2023, <b>352</b> , 135178.                              |
| A-CNT-CoSnS                                                    | 330                            | <a href="https://doi.org/10.1039/C9NR09588H">https://doi.org/10.1039/C9NR09588H</a>                         | <i>Nanoscale</i> , 2020, <b>12</b> , 3879–3887.                             |
| $La_{0.7}K_{0.3}CoO_{3-\delta}$                                | 335                            | <a href="https://doi.org/10.1039/D2CP04708J">https://doi.org/10.1039/D2CP04708J</a>                         | <i>Physical Chemistry Chemical Physics</i> , 2022, <b>24</b> , 28584–28598. |

|                         |                         |                                                                                                               |                                                                   |
|-------------------------|-------------------------|---------------------------------------------------------------------------------------------------------------|-------------------------------------------------------------------|
| $NiCo_2O_4$             | 340                     | <a href="https://doi.org/10.1021/acsami.3c01196">https://doi.org/10.1021/acsami.3c01196</a>                   | <i>ACS Appl Mater Interfaces</i> , 2023, <b>15</b> , 26093–26103. |
| <i>evo-FeOOH</i>        | 350                     | <a href="https://doi.org/10.1002/sml.202301715">https://doi.org/10.1002/sml.202301715</a>                     | <i>Small</i> , 2023, <b>19</b> , 2301715                          |
| <i>Co-H/NiCo@NF</i>     | 350 at 100 mA $cm^{-2}$ | <a href="https://doi.org/10.1002/admi.202202349">https://doi.org/10.1002/admi.202202349</a>                   | <i>Adv Mater Interfaces</i> , 2023, <b>10</b> , 2202349           |
| <i>CoPO</i>             | 350                     | <a href="https://doi.org/10.1002/cctc.201901803">https://doi.org/10.1002/cctc.201901803</a>                   | <i>ChemCatChem</i> , 2020, <b>12</b> , 2091–2096.                 |
| <i>(CoP@NG)</i>         | 354                     | <a href="https://doi.org/10.1016/j.electacta.2019.03.208">https://doi.org/10.1016/j.electacta.2019.03.208</a> | <i>Electrochim Acta</i> , 2019, <b>307</b> , 543–552.             |
| $NiSn(OH)_6@OOH$        | 370                     | <a href="https://doi.org/10.1039/D1TA08531J">https://doi.org/10.1039/D1TA08531J</a>                           | <i>J Mater Chem A Mater</i> , 2022, <b>10</b> , 1369–1379.        |
| $\alpha-CoGd(OH)_2/FTO$ | 371                     | <a href="https://doi.org/10.1039/D4NR01743A">https://doi.org/10.1039/D4NR01743A</a>                           | <i>Nanoscale</i> , 2024, <b>16</b> , 15629–15639.                 |
| <i>NiOOH-MnOOH/NF</i>   | 391 at 100 mA $cm^{-2}$ | <a href="https://doi.org/10.1039/D4QM00512K">https://doi.org/10.1039/D4QM00512K</a>                           | <i>Mater Chem Front</i> , 2024, <b>8</b> , 3290–3299.             |
| <i>Fe3C@C/CNT</i>       | 407                     | <a href="https://doi.org/10.1021/acs.energyfuels.3c01711">https://doi.org/10.1021/acs.energyfuels.3c01711</a> | <i>Energy &amp; Fuels</i> , 2023, <b>37</b> , 13260–13270.        |
| $MnO_2-Ni\ 0.02(M)$     | 445                     | <a href="https://doi.org/10.1021/acs.inorgchem.1c03236">https://doi.org/10.1021/acs.inorgchem.1c03236</a>     | <i>Inorg Chem</i> , 2021, <b>60</b> , 19429–19439.                |
